# Supplementary material for: Novel Breast Cancer Brain Metastasis Patient-Derived Orthotopic Xenograft Model for Preclinical Studies
Source: MDPI journal article supplement (doi:10.3390/cancers12020444), 2020-02-14
Supplement: s1 [file s1]

# Supplementary Materials: Novel Breast Cancer Brain Metastasis Patient-Derived Orthotopic Xenograft Model for Preclinical Studies

Masanori Oshi, Maiko Okano, Aparna Maiti, Omar M. Rashid, Katsuharu Saito, Koji Kono, Ryusei Matsuyama, Itaru Endo and Kazuaki Takabe

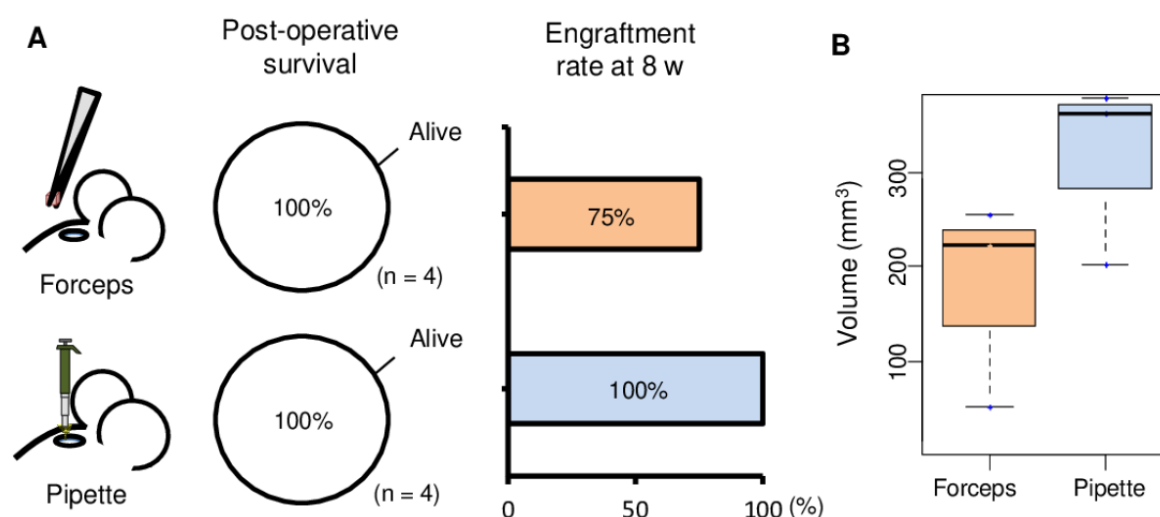

**Figure 1.** Comparison of two methods for tumor implantation in mouse brain. Brain metastasis of one estrogen receptor-positive breast cancer that had been passaged three passages as brain PDX was used for this experiment. The forceps and pipette methods were used for implantation of 1  $\mu$ l tumor in mouse brain. **(A)** Pie charts depict survival rates within 1 day of implantation with the two methods. Rates of engraftment of implanted tumor after 8 weeks of surgery for tumor implantation are plotted for the two implantation methods. **(B)** Tukey boxplots of tumor volumes at 6 weeks in mice with engraftment are shown for the forceps and pipette methods. Magnetic resonance imaging was used for tumor volume measurement.

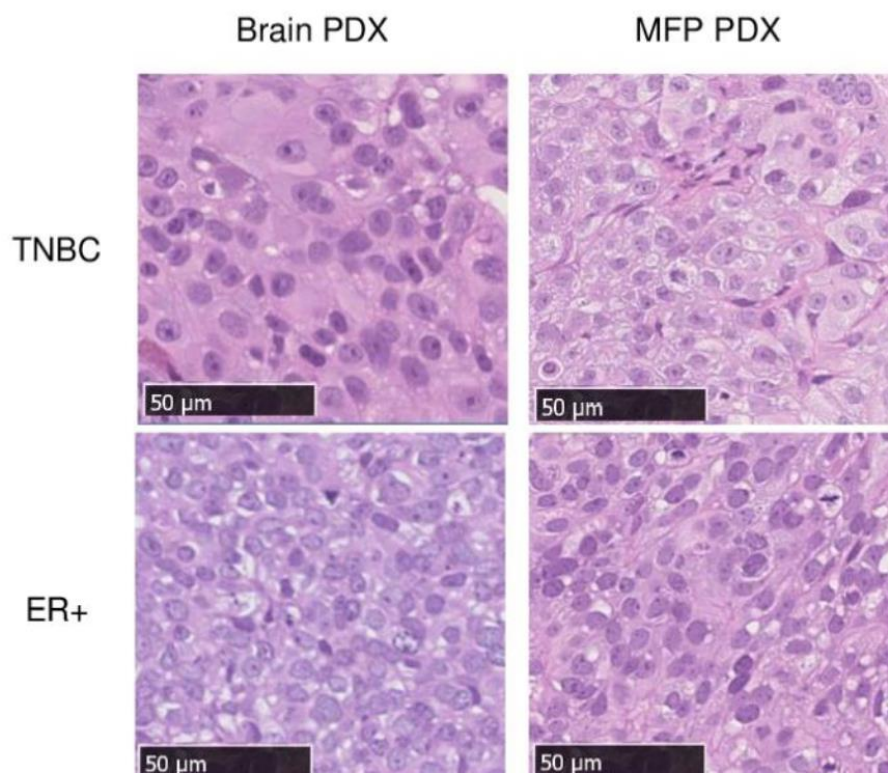

**Figure S2.** Histology of breast cancer brain metastases grown as xenografts in mouse brain or mammary fat pad (MFP). Hematoxylin-eosin-stained sections of patient-derived xenografts (PDXs) are shown for tumors from two patients with estrogen receptor-positive (ER+) or triple negative breast cancer (TNBC) or breast cancer. Scale bar = 50  $\mu$ m.

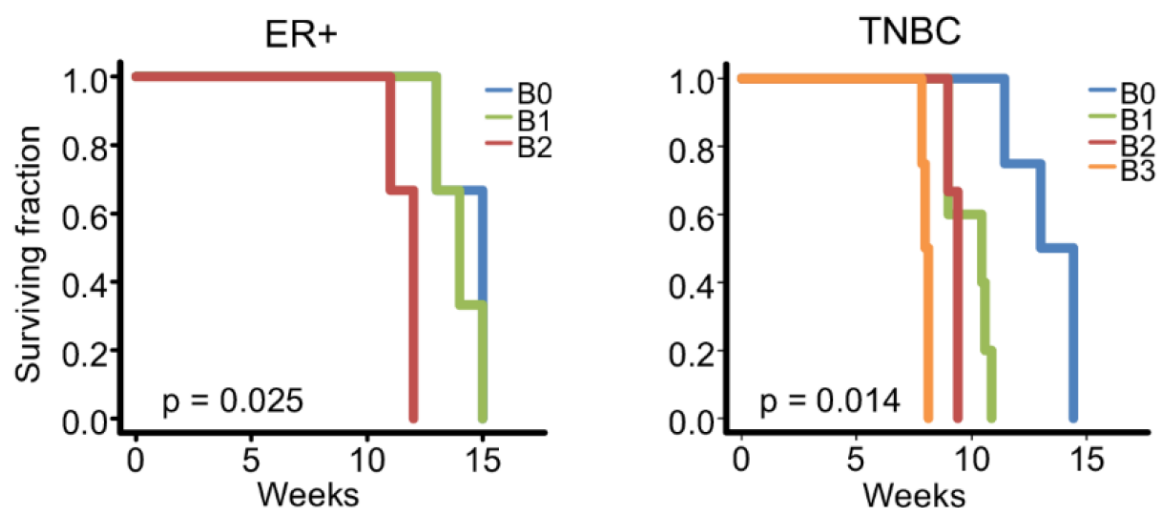

**Figure S3.** Survival of mice whose brains were implanted with brain metastasis of two breast cancer patients. Brain metastases of one each of estrogen receptor-positive (ER+) and triple negative breast cancer (TNBC) tumors were passed thrice in mouse mammary fat pads and then implanted in brain (B0). Mice were sacrificed when symptom-based criteria were fulfilled, and their brain xenografts were further passed 2–3 times through brain implantation in a similar manner (B1–B3). Shown are Kaplan-Meier survival plots with Cox regression analysis-based  $p$  values in comparison of survival of B0 and B2 mice.

**Table 1.** Human breast cancer brain metastasis samples used in this study.

|                                                   | Patient          |            |            |
|---------------------------------------------------|------------------|------------|------------|
|                                                   | #5               | #10        | #30        |
| Age at diagnosis (years)                          | 37               | 48         | 29         |
| Pathologic stage of primary tumor at diagnosis    | 2A               | 2B         | 1A         |
| Other metastasis                                  | Lung, lymph node | Skin       | Lymph node |
| Overall survival (months)                         | 49               | 35         | 38         |
| Disease free survival (months)                    | 42               | 28         | 28         |
| Adjuvant therapy                                  | Yes              | Yes        | Yes        |
| Neoadjuvant chemotherapy                          | Yes              | No         | Yes        |
| Estrogen receptor positivity of primary tumor     | Negative         | Positive   | Negative   |
| HER2 receptor positivity of primary tumor         | Negative         | Negative   | Negative   |
| Progesterone receptor positivity of primary tumor | Negative         | Negative   | Negative   |
| Figures for which sample was used                 | S3               | S1, S2, S3 | 1–6, S2    |

**Table 2.** Gene expression data generated in this study.

Microsoft Excel file Table\_S2.xlsx.

Transcripts per million (TPM) values generated as described in the test are provided. Human Gene Nomenclature Committee gene symbols are used.

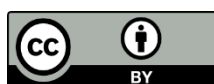

© 2020 by the authors. Licensee MDPI, Basel, Switzerland. This article is an open access article distributed under the terms and conditions of the Creative Commons Attribution (CC BY) license (<http://creativecommons.org/licenses/by/4.0/>).
