# Supplementary material for: Novel Breast Cancer Brain Metastasis Patient-Derived Orthotopic Xenograft Model for Preclinical Studies
Source: Cancers (Basel). 2020 Feb 14;12(2):444. doi: 10.3390/cancers12020444 (PMC7072242; doi:10.3390/cancers12020444)
Supplement: Supplementary file 1 [file cancers-12-00444-s001.zip › Table_S2.xlsx]

## Sheet: brain_PDXs_Gene_expression_TPM
	Brain_PDX	MFP_PDX	Brain_met
A1BG	0.383437	0.81309	1.63849
A1BG-AS1	1.00196	4.40227	2.73018
A1CF	0.128988	0	0
A2M	0.0515592	0.0431171	13.5254
A2M-AS1	0.376724	0.463925	0.32535
A2ML1	6.50525	0.251275	4.20274
A2ML1-AS1	0.121369	0	0
A2ML1-AS2	0	0	0.142122
A2MP1	0.0295533	0	0
A3GALT2	0.107251	0.134535	0.813323
A4GALT	0.659667	3.07568	6.25094
A4GNT	0	0.0309763	0
AAAS	1.74997	2.39472	6.88107
AACS	1.5849	2.7917	2.59399
AADAC	0	0	0.0554243
AADACL2	0.0182307	0	0
AADACL2-AS1	0	0.145587	0.518352
AADACL3	0	0.121939	0.0793124
AADACL4	0.0348311	0	0
AADACP1	0	0	0.136809
AADAT	2.63605	0.90174	1.52358
AAED1	1.01155	3.47728	1.76104
AAGAB	13.2171	11.8076	8.82104
AAK1	1.07125	4.72796	11.7283
AAMDC	4.52009	0.762322	1.03889
AAMP	10.5108	18.0475	15.8523
AANAT	0.0422135	0.0250497	0.125689
AAR2	5.48862	13.9819	8.22619
AARD	14.189	3.37288	1.61484
AARS	25.7586	13.8915	34.6936
AARS2	5.93518	2.65781	12.2174
AARSD1	2.29135	4.61739	3.36204
AASDH	1.75633	1.9222	4.27079
AASDHPPT	1.94309	3.78409	5.30793
AASS	0.966562	0.406274	0.429687
AATBC	1.95365	0.0225109	0.11295
AATF	5.96184	8.46043	5.61536
AATK	0.202692	0.243201	0.965317
AATK-AS1	0	0	0.0254446
ABALON	0.0241075	0.43722	0.374759
ABAT	0.141246	3.24478	1.45818
ABCA1	1.87548	1.02629	4.31138
ABCA10	0.142989	0.55479	0.371161
ABCA11P	3.44097	3.20643	5.76555
ABCA12	0.136421	3.48544	3.90934
ABCA13	0.0431417	0.00721557	0.198718
ABCA17P	0.258204	0.112501	0.116828
ABCA2	4.04817	8.43864	9.87213
ABCA3	7.43731	1.43438	3.76709
ABCA4	0.475492	0.202909	0.140475
ABCA5	0.537833	4.06537	9.65368
ABCA6	0.0129677	0.0914612	0.158944
ABCA7	0.663448	1.7789	5.42885
ABCA8	0	0.00822269	0.200055
ABCA9	0	0.0240109	0.326291
ABCA9-AS1	0	0.04603	0.0618379
ABCB1	0.0377947	0.0395079	0.493606
ABCB10	4.80755	8.81902	3.54469
ABCB10P1	0	0.0754593	0.0210347
ABCB10P4	0	0.105029	0.084659
ABCB11	0.115782	0.035895	0.0319505
ABCB4	0.238749	0.0123362	0.0658834
ABCB5	0	0.0399471	0.0770408
ABCB6	3.72988	1.81282	1.18988
ABCB7	5.63366	2.50236	4.98035
ABCB8	1.60195	3.41629	4.69498
ABCB9	0.862502	0.648022	0.707599
ABCC1	11.2542	2.9252	12.0701
ABCC10	3.33918	2.97974	13.05
ABCC11	0.0443252	0.0893214	0.219587
ABCC12	0	0	0.0247982
ABCC13	0	0.0258667	0.010233
ABCC2	0.148343	0.448942	0.397518
ABCC3	0.00477185	3.46174	2.59059
ABCC4	0.0945877	2.40652	2.07116
ABCC5	3.94568	7.73293	5.54775
ABCC6	0.171222	0.0435446	0.0546222
ABCC6P1	0	0.0159892	0
ABCC6P2	0	0.0851933	0.0858381
ABCC8	0	0	0.0323747
ABCC9	0.00401686	0	0.225757
ABCD1	6.20249	1.36078	2.81784
ABCD1P2	0	0.0577437	0
ABCD2	0.607623	0.00879432	0.0367719
ABCD3	7.0042	5.33264	5.05333
ABCD4	0.805678	1.92929	2.37103
ABCE1	14.6407	11.0426	12.6166
ABCF1	11.3804	27.8385	20.425
ABCF2	17.7912	12.4074	14.718
ABCF2P1	0.0495167	0.0293835	0.147434
ABCF3	9.96027	9.76651	8.94272
ABCG1	0.921305	0.0716993	1.66388
ABCG2	0.0190692	7.53632	1.04093
ABCG4	0	0.00731567	0
ABCG5	0	0	0.014747
ABCG8	0.185265	0	0.104069
ABHD1	0.0594513	0.0399342	0.0947887
ABHD10	4.31484	5.95622	3.12829
ABHD11	17.8175	7.10825	4.60154
ABHD11-AS1	0.331354	0.0983135	0.328864
ABHD12	5.57904	21.892	10.367
ABHD12B	0	1.25914	1.9511
ABHD13	1.4799	5.34568	7.68954
ABHD14A	0.36655	0.855277	0.669012
ABHD14A-ACY1	4.18287	3.34958	11.4064
ABHD14B	2.36895	2.42969	2.3947
ABHD15	0.625822	2.41929	1.46616
ABHD16A	9.572	5.68007	7.93147
ABHD16B	0.0441488	0.0523963	0
ABHD17A	4.55743	2.212	7.30365
ABHD17AP1	1.37679	1.58538	1.17597
ABHD17AP4	0.508513	0.241403	0.151408
ABHD17AP5	0	0	0.0497038
ABHD17AP6	1.36622	0.834919	1.94813
ABHD17B	4.26362	4.34276	1.68711
ABHD17C	3.49102	2.37045	2.66203
ABHD2	7.4458	17.7657	9.46575
ABHD3	0.5464	7.83455	3.97055
ABHD4	1.41528	2.34455	3.83874
ABHD5	1.66324	5.39181	2.80175
ABHD6	0.275135	0.409042	1.10762
ABHD8	0.685035	6.56755	3.40076
ABI1	15.451	8.63585	14.0491
ABI2	0.548608	2.94013	1.48369
ABI3	0	0	0.61642
ABI3BP	3.75787	0.484759	0.547376
ABL1	18.192	4.09082	7.25867
ABL2	6.04213	13.7238	6.22372
ABLIM1	9.00329	5.91641	11.8475
ABLIM2	0.48906	0.0725527	0.144099
ABLIM3	0.0895687	3.3333	1.59377
ABO	0.00722011	0.232792	1.34687
ABR	0.850219	4.76884	5.43951
ABRACL	19.337	8.86886	6.49918
ABT1	3.6247	10.6586	6.43649
ABTB1	0.463923	1.12658	4.60058
ABTB2	5.91159	7.64473	5.81183
ACAA1	2.00783	5.32101	3.227
ACAA2	10.3894	3.58011	2.26127
ACACA	10.8554	8.89106	18.3218
ACACB	0.139164	1.45316	1.32372
ACAD10	2.34975	1.51106	2.54784
ACAD11	2.1588	6.20771	4.32181
ACAD8	1.00939	0.831329	2.69328
ACAD9	12.7924	8.22746	17.84
ACADL	0.0125163	0.0104669	0.0421847
ACADM	8.02128	7.11113	3.57766
ACADS	0.79695	2.2693	1.65737
ACADSB	1.59622	1.65761	0.682098
ACADVL	21.967	23.0261	18.6524
ACAN	0.00841155	0	0.0502924
ACAP1	0.012364	0.124576	1.04233
ACAP2	2.77702	14.618	5.68919
ACAP2-IT1	1.03357	1.86166	3.34955
ACAP3	6.88451	2.91452	5.51519
ACAT1	5.11575	2.53467	1.28165
ACAT2	16.9143	27.8913	4.59391
ACBD3	12.3578	19.3995	24.1842
ACBD4	0.538625	0.711888	1.33645
ACBD5	5.54171	6.17587	2.40973
ACBD6	5.92991	3.64594	7.40861
ACBD7	1.72799	0.402836	0.0612504
ACCS	2.90961	1.28354	3.85595
ACD	0.953686	2.66759	2.2638
ACE	0.137721	1.53013	2.80714
ACE2	1.76607	0.489063	0.245392
ACE3P	0	0.0468564	0.0278048
ACER1	0.127955	0	0
ACER2	0.29415	14.7182	16.4406
ACER3	1.91701	1.42379	5.03742
ACHE	0.0495565	0.308775	0.233625
ACIN1	16.6203	11.522	31.4079
ACKR1	0	0	0.261405
ACKR2	0.0922732	11.3425	4.42362
ACKR3	0.0242954	1.15809	4.17611
ACKR4	0.0813442	0.19308	0.0403665
ACLY	19.1614	50.5388	19.0434
ACO1	2.73024	2.86008	4.35624
ACO2	11.0641	10.1153	23.1977
ACOT1	0.320251	0.294596	0.485715
ACOT11	0.819964	0.821908	5.40414
ACOT12	0	0	0.0187711
ACOT13	2.0725	2.23432	3.68192
ACOT2	0	0.848216	0.709333
ACOT4	0.209031	0.757488	1.25247
ACOT6	0	0	0.0387799
ACOT7	2.69004	16.7211	9.61139
ACOT8	2.35686	2.90744	6.53914
ACOT9	9.58187	11.2305	8.17341
ACOX1	2.38805	24.7706	13.3715
ACOX2	0.0284317	0.582522	1.7009
ACOX3	5.62474	2.80999	3.29223
ACOXL	0.0239481	0.305639	0.238642
ACP1	18.3566	13.7519	18.4451
ACP2	4.02934	5.36005	3.40113
ACP5	0.019495	2.39654	7.12905
ACP6	2.27967	1.31186	3.0919
ACPP	0.0109412	0.661443	4.94555
ACPT	0	0	0.102175
ACR	0.213148	0	0.0897986
ACRBP	0.270146	0.0645467	0.0325176
ACRC	0.595471	1.25102	1.13627
ACSBG1	0.00557431	0.011233	0.0199972
ACSF2	0.2839	2.45329	5.08725
ACSF3	1.28607	4.03847	4.01453
ACSL1	5.11038	9.29773	9.8561
ACSL3	12.8434	14.6311	19.6771
ACSL4	2.76695	4.60935	2.9607
ACSL5	0.284914	0.0216603	0.938444
ACSL6	0.953957	0.0330992	0.0706198
ACSM1	0.019108	0.0319586	0.0322005
ACSM2A	0	0	0.00559949
ACSM3	1.30205	0.425481	0.280537
ACSM5	0	0	0.139966
ACSM6	0	0.0163436	0
ACSS1	0.34839	6.23338	9.75228
ACSS2	3.32254	23.4853	9.21956
ACSS3	0.692912	1.74539	0.556223
ACTA1	0.185514	3.77958	0
ACTA2	1.06894	1.23238	1.75807
ACTA2-AS1	0	0.230608	0.232354
ACTB	552.431	651.487	1596.85
ACTBL2	0.0196346	0.279135	0.529407
ACTBP1	0	0.0830617	0
ACTBP11	1.67046	6.97873	0.0974404
ACTBP13	0.0199499	0	0.0495
ACTBP14	0.0848923	0	0
ACTBP2	0.635055	0.285963	1.97573
ACTBP7	0	0.489786	1.31598
ACTBP8	0.0990234	0	0
ACTBP9	0	0.0499171	0.166976
ACTC1	0	1.14708	0.178008
ACTG1	128.41	389.396	670.836
ACTG1P1	2.27554	2.53842	1.94363
ACTG1P10	0.256324	0.202806	0.0423998
ACTG1P12	0.237858	0	0
ACTG1P14	0.988745	1.41792	2.04441
ACTG1P16	0	0.0423998	0
ACTG1P17	0.392597	0.153214	0.485174
ACTG1P19	0.0828384	0.0491568	0
ACTG1P20	0.784215	3.75322	1.99274
ACTG1P21	0	0.0924477	0.0548589
ACTG1P23	0	0.0427156	0
ACTG1P24	0.062553	0.0523108	0.210827
ACTG1P3	3.9004	1.03415	1.15309
ACTG1P4	0.327106	0.576768	0.537833
ACTG1P9	0.626056	0.743011	0.0172598
ACTG2	7.75885	2.82892	0.921808
ACTL10	0.746512	0.72937	1.24434
ACTL6A	11.6883	11.3349	13.3577
ACTL6B	0.0576098	0	0
ACTL7B	0.0388599	0	0.019284
ACTL8	11.7543	0	0
ACTN1	5.22836	34.4525	15.705
ACTN1-AS1	0.0987689	0.11722	0.0490134
ACTN2	0.501524	0.109123	0.0580716
ACTN3	0.0262859	0.0623929	0.208708
ACTN4	36.2092	83.0937	33.313
ACTN4P2	0.19545	0	0
ACTR10	1.84006	7.50751	2.30899
ACTR1A	5.01493	16.3231	6.99841
ACTR1B	12.3869	6.93225	20.2349
ACTR2	42.3652	45.0745	62.5037
ACTR3	10.0665	19.5141	10.5963
ACTR3B	9.20794	2.31311	3.08433
ACTR3C	1.87675	3.25255	8.95855
ACTR5	3.92858	2.97286	1.78856
ACTR6	3.17615	4.10039	1.91303
ACTR8	1.79399	10.0951	5.46431
ACTRT1	0.0643338	0	0
ACTRT3	0.96828	0.984998	0.594908
ACVR1	1.63614	2.79399	8.96673
ACVR1B	5.75158	1.51368	2.43493
ACVR1C	0	0.167053	0.0798287
ACVR2A	1.5021	2.42287	2.29044
ACVR2B	1.25589	2.68347	1.35545
ACVR2B-AS1	1.28553	0.152568	0.200494
ACVRL1	0.0326541	0	0.990511
ACY1	5.06563	2.83897	4.44102
ACY3	0.0421992	0	0.355568
ACYP1	0.996775	3.66577	2.35408
ACYP2	1.12751	1.58301	1.64665
ADA	1.76943	0.972451	1.19259
ADAD2	0	0	0.0449758
ADAL	0.856895	0.604427	0.689994
ADAM10	3.64805	5.58158	3.33405
ADAM11	0.116286	0.0575041	0.134648
ADAM12	0.0930559	0.356289	0.739984
ADAM15	26.2546	3.4073	10.7135
ADAM17	14.3267	18.4893	31.9888
ADAM18	0	0.0286844	0.0359816
ADAM19	0.747688	0.0714588	0.959997
ADAM1A	4.03834	1.44298	1.91781
ADAM1B	0.0458766	0.0924477	0.0822884
ADAM2	0	2.10036	0.793141
ADAM20	0.164138	0.429989	0.215903
ADAM20P1	0.639882	0.198895	0.166329
ADAM21	0	0.0345196	0.0347809
ADAM22	0.40165	0.0674551	0.259487
ADAM23	0.0571582	0.0575908	0.0341747
ADAM28	0.0175999	0.0932152	0.74148
ADAM29	0.00920916	0.00770129	0
ADAM32	2.54038	0.6445	0.383675
ADAM33	0.0316927	0.00940332	0.0943639
ADAM3B	0	0	0.054615
ADAM5	0.0482573	0.0972451	0
ADAM8	0.193405	7.57467	4.89478
ADAM9	3.39645	36.8181	24.5529
ADAMDEC1	0	0	0.451615
ADAMTS1	0.675737	4.92996	6.38744
ADAMTS10	0.615994	0.0192386	0.321772
ADAMTS12	0.450414	0.208003	0.201976
ADAMTS13	1.36475	0.0964469	0.874593
ADAMTS14	0.130603	0.59655	1.06199
ADAMTS15	0.0323473	0.0814804	0.174063
ADAMTS16	0.130995	0.0782476	0.015768
ADAMTS17	0.23555	0.226305	0.339538
ADAMTS19	0.102568	0.0304321	0.0169662
ADAMTS19-AS1	0	0	0.117618
ADAMTS2	0.0596807	0.168371	0.299737
ADAMTS20	0.00633479	0.0382965	0.0151502
ADAMTS3	0.0842348	5.9066	1.69991
ADAMTS4	0	0.0799089	0.483082
ADAMTS5	0.0102084	0.127213	0.334348
ADAMTS6	0.0374852	2.25535	0.179299
ADAMTS7	0.149035	0.0415441	0.562101
ADAMTS7P1	0	0.00941058	0.0189636
ADAMTS7P4	0	0.008317	0
ADAMTS8	0.0613184	0	0.010143
ADAMTS9	0.176118	6.3363	1.1506
ADAMTS9-AS2	0.00758558	0.28546	0.421844
ADAMTSL1	0.210555	0.0583074	0.0278631
ADAMTSL2	0.0117295	0	0.573227
ADAMTSL3	0.145804	0.900403	0.281213
ADAMTSL4	0.358221	12.2323	19.6049
ADAMTSL4-AS1	2.62452	1.58663	2.92916
ADAMTSL5	0.0253112	1.37715	1.52848
ADAP1	0.29261	1.83071	13.2955
ADAP2	0.0438872	1.45582	3.1802
ADAR	35.0123	16.7947	41.6767
ADARB1	2.9715	2.31468	3.54266
ADARB2	0.0574002	0	0.00879365
ADAT1	5.78826	7.66619	5.97994
ADAT2	3.57826	1.30437	4.69003
ADAT3	2.31741	1.32245	1.91283
ADCK1	1.39097	0.928588	1.06991
ADCK2	5.44258	3.59075	11.6789
ADCK3	4.89699	1.05321	5.16958
ADCK4	1.94775	2.44259	3.24875
ADCK5	7.46258	1.68984	7.82198
ADCY1	2.33282	0.0273312	0.101365
ADCY10	0.125106	0.0373649	0.135532
ADCY10P1	0.639283	0.772947	1.04157
ADCY2	0.131376	0	0.0737979
ADCY3	4.05907	9.07995	5.42432
ADCY4	0.0408025	0.210417	0.962638
ADCY5	0.0568739	0.166704	0.840845
ADCY6	4.13489	7.06823	4.93796
ADCY7	4.93851	3.70648	3.75685
ADCY8	0.0307845	0	0.0828268
ADCY9	1.09633	0.513775	2.70435
ADCYAP1	0.259517	0.0361708	0.0728891
ADCYAP1R1	0.0201449	0	0.104386
ADD1	8.09076	4.96016	4.56806
ADD2	0.190467	0	0.0437691
ADD3	0.369025	5.52679	9.65323
ADD3-AS1	0	0.0307919	0.0060907
ADGB	0	0.0118041	0
ADGRA1	0.0846561	0	0
ADGRA2	0.136441	0.968861	1.10324
ADGRA3	4.33968	7.64567	5.60451
ADGRB1	7.49018	0	0.178985
ADGRB2	0.20512	1.14751	2.16935
ADGRB3	0.23668	0	0.156691
ADGRD1	0.044728	0	0.131907
ADGRD2	0	0	0.0593497
ADGRE1	0	0.0990053	0.349141
ADGRE2	2.21952	1.59067	3.41068
ADGRE3	0	0	0.0323416
ADGRE4P	0	0	0.177879
ADGRE5	2.88463	2.83852	7.47208
ADGRF1	0	0.025896	0.685847
ADGRF2	0.00857841	0.0573906	0.11565
ADGRF3	0.0557431	0.320943	0.142837
ADGRF4	0	3.26792	1.50171
ADGRF5	0	0.569978	1.14668
ADGRF5P1	0.147371	0.338914	0.496697
ADGRF5P2	0.0829595	0.0557249	0.13227
ADGRG1	10.858	7.3745	8.77901
ADGRG2	1.7297	0.0216086	0.0135529
ADGRG3	0.0137768	0.0277621	0.115319
ADGRG4	0	0.100187	0.064238
ADGRG5	0.00937439	0.0235184	0.110583
ADGRG6	11.2818	6.68822	5.34406
ADGRG7	0.040229	0.0448561	0.0225978
ADGRL1	15.4164	1.03786	3.44214
ADGRL2	0.728717	7.43113	6.52165
ADGRL3	0.0524379	0.0924609	0.156762
ADGRL4	0	0	0.969822
ADGRV1	2.75941	0.0175705	0.224244
ADH1B	0.00513949	0	0.0779491
ADH1C	0	0	0.0246648
ADH5	12.7481	10.6877	9.23
ADH5P2	0	0.164498	0.0488069
ADH5P4	0.0494225	0	0
ADHFE1	3.16854	4.80728	3.35005
ADI1	7.09602	13.917	7.63684
ADIG	0.0894944	0	0.088822
ADIPOQ	0	0.0198901	0
ADIPOQ-AS1	0.0268509	0	0
ADIPOR1	17.7308	14.2817	21.7149
ADIPOR1P1	0.172156	0	0
ADIPOR2	17.2376	8.24097	6.00189
ADIRF	0.0459685	3.05689	2.41863
ADIRF-AS1	0	1.06893	1.81176
ADK	6.56447	12.6362	13.5013
ADM	8.03431	6.63256	3.83488
ADM2	2.6942	0.203848	1.62151
ADM5	3.06724	0.638637	1.65562
ADNP	18.3934	41.2692	20.9566
ADNP-AS1	0.299183	0.414253	0.445404
ADNP2	9.97943	4.62425	8.39292
ADO	6.21644	3.2254	5.45459
ADORA1	9.42489	0.749993	0.183256
ADORA2A	0.705539	1.3476	0.831533
ADORA2A-AS1	0	0.344525	0.204443
ADORA2B	0.451602	2.67958	10.4008
ADORA3	0	0.177812	1.92905
ADPGK	5.66996	2.54483	9.21203
ADPGK-AS1	0.0883821	0	0.0146197
ADPRH	0.520832	2.37742	1.77939
ADPRHL1	0.317348	6.83465	4.10315
ADPRHL2	4.54479	8.7156	7.89363
ADPRM	1.01591	0.623015	1.0272
ADRA1A	0	0	0.0474253
ADRA1B	1.3298	3.88242	2.0589
ADRA1D	0	0.0786508	0.0493297
ADRA2A	0.30762	0.0367503	0.148114
ADRA2B	0.137122	0.683499	0.84377
ADRA2C	0.453172	0.294755	2.71531
ADRB1	0.0643205	0.486055	1.09603
ADRB2	0	0.0318669	0.572958
ADRB3	0.0313382	0.0557888	0.279925
ADRBK1	12.2339	8.71652	12.7615
ADRBK2	1.98748	1.96367	1.57804
ADRM1	33.1465	32.5261	23.7522
ADSL	5.14303	4.39868	6.97625
ADSS	20.4711	21.4867	34.2455
ADSSL1	1.5528	1.28242	2.77245
ADTRP	0	1.77135	1.53659
AEBP1	0.0885715	1.42583	13.6573
AEBP2	6.12697	3.7067	6.87871
AEN	4.6126	2.89683	5.77606
AES	22.0658	11.231	20.6428
AFAP1	3.83067	9.29451	4.84853
AFAP1-AS1	0.0136052	4.26277	6.41394
AFAP1L1	0	2.21279	1.25498
AFAP1L2	0.159695	4.80454	5.30168
AFF1	0.633794	7.02703	17.8125
AFF2	0.0396035	0.0117505	0.0163775
AFF3	0.465162	0.0684349	0.152422
AFF4	6.96047	28.1918	10.3531
AFG3L1P	2.42467	2.97546	4.6252
AFG3L2	8.06684	22.0628	18.2564
AFG3L2P1	0.0260219	0	0
AFMID	1.68864	6.05203	6.49146
AFTPH	6.49708	6.61062	11.9748
AGA	1.5381	1.11476	2.93759
AGAP1	2.18523	5.65409	3.56832
AGAP1-IT1	2.31333	2.76365	7.51833
AGAP10P	0.458797	0.385692	0.189729
AGAP11	0.150175	0.267344	0.238475
AGAP2	0.920629	0.0652306	0.279569
AGAP2-AS1	1.28454	0.184895	0.438872
AGAP3	3.87374	2.47431	13.6174
AGAP4	3.45829	4.08056	11.2566
AGAP5	0.839475	2.84911	2.06051
AGAP6	7.1525	6.56209	20.713
AGAP7P	0.269004	0.319257	0.222486
AGAP9	5.58322	7.04999	7.18432
AGBL2	0.0920376	0.0674431	0.0100053
AGBL3	0.420656	0.177127	0.0976004
AGBL4	0.294071	0	0
AGBL4-IT1	0.803286	0	0
AGBL5	2.85697	6.47466	2.91792
AGBL5-AS1	0.134789	0	0.227144
AGBL5-IT1	0.135329	0.272707	0.323652
AGER	0.905604	1.64688	2.53561
AGFG1	6.90308	6.90372	4.4592
AGFG2	1.56948	1.02147	1.30645
AGGF1	5.802	5.03951	3.02453
AGGF1P1	0.154914	0	0.0264636
AGGF1P2	0.599124	0.0217838	0.131692
AGGF1P3	2.89445	0.302566	0
AGGF1P8	0	0.183506	0
AGK	3.20933	5.26699	3.84608
AGL	3.39801	5.39223	3.25825
AGMAT	0.92163	0.201857	0.591665
AGMO	0.0764691	0	0.025773
AGO1	3.0404	24.493	19.098
AGO2	46.4253	9.27193	7.71902
AGO3	2.01338	3.28818	2.38826
AGO4	5.26673	4.61247	3.20069
AGPAT1	12.9849	5.65058	7.99776
AGPAT2	19.9275	21.5951	14.4012
AGPAT3	7.42072	2.81855	7.07107
AGPAT4	2.36995	2.16122	0.900865
AGPAT4-IT1	1.5482	1.12371	1.87061
AGPAT5	5.81782	6.98686	3.00998
AGPAT6	13.3088	8.64484	15.9184
AGPAT9	1.48695	2.69862	1.67941
AGPS	2.20185	6.44746	10.0376
AGR2	0	0.584906	0.67489
AGR3	0.141877	0.0395488	0.63757
AGRN	11.7438	32.0769	119.8
AGT	0.0718362	0.180222	1.5334
AGTPBP1	9.56484	2.02153	1.04033
AGTR1	0	0	0.0131905
AGTRAP	1.73332	7.40341	4.41575
AGXT	0	0.0102885	0.0207328
AGXT2	0.116963	0	0
AHCTF1	11.6255	33.3077	13.405
AHCY	39.8137	42.4051	30.172
AHCYL1	18.2232	26.8682	14.8279
AHCYL2	4.44849	1.58385	1.65231
AHCYP2	0.0843984	0	0
AHCYP5	0	0.111171	0.074675
AHCYP8	0	0.43901	0
AHDC1	3.30116	4.86975	4.56838
AHI1	2.06076	4.42692	6.60568
AHNAK	63.6409	71.9837	158.849
AHNAK2	1.85256	25.3196	17.7778
AHR	4.88385	10.4825	42.8304
AHRR	1.02771	3.50381	1.87198
AHSA1	18.6589	19.5951	15.6242
AHSA2	5.53694	5.19409	20.0292
AHSG	0	0	0.0466289
AHSP	0	0	0.164498
AIDA	5.96366	14.1166	4.81314
AIF1	0	0	2.02067
AIF1L	22.5703	1.50038	2.17407
AIFM1	8.82788	3.66347	6.29181
AIFM2	2.29606	2.77253	1.54908
AIFM3	0.237835	0.941422	1.09698
AIG1	1.59378	14.614	6.21905
AIM1	4.13002	5.37747	15.096
AIM1L	0.121473	6.34505	9.30618
AIM2	0	0.0456711	0.184067
AIMP1	7.08814	7.5542	14.7505
AIMP1P1	1.28804	0.0489611	0.0986635
AIMP1P2	0	0.14704	0
AIMP2	19.7168	7.07376	8.51138
AIP	5.07335	13.213	10.2663
AIRE	0	0.011727	0.0196138
AIRN	0.0422715	0	0.0104885
AJAP1	0.0147929	2.64562	0.667771
AJUBA	2.6904	5.76207	5.03346
AK1	4.34017	1.65135	3.50102
AK2	15.4806	13.8991	14.419
AK2P2	0.226551	1.3696	1.35454
AK3	7.67132	11.4172	9.32268
AK3P3	2.3491	1.67074	1.3219
AK4	9.43806	19.2264	9.18659
AK4P1	0.554409	2.22068	1.30683
AK4P3	4.67408	7.88611	15.2007
AK4P4	0.572431	0.679368	0.426098
AK5	0.0397831	0	0.0872161
AK6	2.48268	10.9466	4.28823
AK6P2	0.19628	0	0
AK7	0.0550409	0.628518	0.27424
AK8	1.00437	0.151186	0.473917
AK9	0.668216	0.104492	0.311272
AKAP1	11.7772	12.3629	11.4209
AKAP10	5.24404	4.28868	3.82305
AKAP11	4.10207	22.1986	13.6152
AKAP12	0.150625	6.88595	3.42673
AKAP13	16.8621	7.15763	7.77052
AKAP17A	6.75808	2.42048	10.4358
AKAP17BP	0	0.0680012	0.0201761
AKAP2	1.89097	7.42241	9.97146
AKAP3	0.512797	0.277242	0.329034
AKAP5	0.0292114	0.311462	0.22152
AKAP6	0.43442	0.140441	0.180567
AKAP7	1.11116	1.51391	3.45048
AKAP8	8.13435	5.8734	15.2143
AKAP8L	9.67011	12.2633	9.95472
AKAP9	7.49998	9.77275	5.05208
AKIP1	2.48058	3.0119	4.09985
AKIRIN1	12.9892	22.7793	38.146
AKIRIN2	8.42256	16.5564	12.5964
AKIRIN2P1	0.130331	0	0
AKNA	0.571239	4.83996	5.25251
AKNAD1	0.0111615	0.00933399	0.0376186
AKR1A1	8.34925	4.64499	16.6471
AKR1B1	0.224832	17.4231	17.1256
AKR1B10	0	0.220191	0.0789161
AKR1B15	0	1.22337	0.841445
AKR1B1P1	0.290108	0.114768	0.143964
AKR1B1P7	0.0578071	0	0
AKR1C1	1.16127	0.0415455	0.0627899
AKR1C2	0.234464	0	0.0136884
AKR1C3	0.313136	0	0.101479
AKR1C5P	0.075331	0	0
AKR1C7P	0.103293	0	0.153776
AKR1D1	0.0298893	0.035473	0.0296648
AKR1E2	8.23906	0.626366	1.83595
AKR7A2	5.12602	8.66859	4.40473
AKR7A2P1	0	0.200553	0.303107
AKR7A3	1.8922	0.288731	0.187799
AKR7L	0.336923	0.0497217	0.166994
AKT1	22.263	12.2526	9.25587
AKT1S1	6.768	3.03125	4.77398
AKT2	4.79081	2.84383	7.63685
AKT3	0.94643	18.516	3.26825
AKT3-IT1	0.532417	14.1264	1.80387
AKTIP	1.76114	2.9191	3.92752
ALAD	3.3468	1.33496	3.37658
ALAS1	4.08837	15.8575	7.22511
ALAS2	0	0.0257071	0
ALB	0.013585	0	0.0487346
ALCAM	2.07048	27.7124	8.07716
ALDH16A1	2.34175	2.72783	4.18265
ALDH18A1	15.6125	11.639	8.78306
ALDH1A1	0.292042	0.077022	0.257643
ALDH1A2	0.0536115	0.114528	0.239439
ALDH1A3	5.48399	0.397406	1.69776
ALDH1B1	11.1564	5.54673	1.88534
ALDH1L1	0.0539368	0.020004	0.184015
ALDH1L1-AS1	0.104981	0	0
ALDH1L2	0.345139	3.96655	2.93415
ALDH2	0.0959467	0.462542	3.0055
ALDH3A1	0.0280035	0	0.0707869
ALDH3A2	2.25995	1.65545	4.72475
ALDH3B1	0.0830847	5.59486	2.87293
ALDH3B2	2.37192	3.39159	7.17575
ALDH4A1	3.33303	1.76964	2.18874
ALDH5A1	1.51123	7.42928	5.38164
ALDH6A1	2.75116	1.43536	3.36299
ALDH7A1	4.56708	7.6382	7.69978
ALDH7A1P1	0.500995	0.568594	3.01525
ALDH7A1P4	0	0	0.257734
ALDH8A1	0.255936	0.257874	0.133896
ALDH9A1	15.2073	6.06048	13.3306
ALDOA	34.3422	86.2274	49.6878
ALDOAP2	0.0509841	0.170545	0.343672
ALDOB	0.339465	0	0
ALDOC	3.18065	5.33595	3.05396
ALG1	2.80606	3.22827	2.24512
ALG10	1.29613	2.8857	2.19986
ALG10B	0.972693	1.55072	1.99446
ALG11	1.77775	9.69287	7.18086
ALG12	3.24863	0.963877	0.934682
ALG13	4.96683	5.27273	2.9835
ALG14	0.485769	0.623803	0.449897
ALG1L	0.217682	0.986986	1.8872
ALG1L10P	4.1403	0.865596	3.70663
ALG1L11P	0.611688	0	0.121909
ALG1L12P	0.213013	0	0
ALG1L13P	0.0379122	4.7874	0.447224
ALG1L14P	0.505612	0	0.213013
ALG1L15P	0.0690919	0	0
ALG1L2	0.0612096	0.986766	1.35409
ALG1L3P	0.72508	0	0
ALG1L5P	0.119906	0	0
ALG1L6P	0	0	0.121963
ALG1L8P	0	0	0.121642
ALG1L9P	0.599551	0.167128	0.673571
ALG2	7.06196	5.30587	10.1962
ALG3	5.6696	4.58236	13.3441
ALG3P1	0.414936	0	0.123546
ALG5	2.78103	6.53117	3.7006
ALG6	2.76186	2.16645	1.09718
ALG8	9.8167	9.67293	31.0214
ALG9	1.51302	1.50002	2.56126
ALG9-IT1	0.402426	0.405472	0.641625
ALK	0.0595628	0	0.0237416
ALKBH1	0.500061	3.28313	1.50457
ALKBH2	1.96328	2.34147	2.25185
ALKBH3	5.78292	12.6667	5.78193
ALKBH4	1.84538	1.87934	2.08806
ALKBH5	8.28367	25.0681	13.3106
ALKBH6	1.98118	1.78902	1.70982
ALKBH7	4.32058	5.39164	5.80157
ALKBH8	1.55926	2.31318	1.23193
ALLC	0	0.145472	0.107905
ALMS1	5.92798	9.66971	4.39918
ALMS1-IT1	1.27579	0.95803	1.36017
ALMS1P	0.391254	0.0663349	0.249631
ALOX12	0.494751	0.39844	0.754087
ALOX12-AS1	0.801483	0.755816	1.2357
ALOX12B	0.0413094	0.138182	0.313264
ALOX12P1	0.335955	0.0752219	0.267822
ALOX12P2	0.56788	6.55553	4.83108
ALOX15	0.016116	0.215636	1.14066
ALOX15B	0	2.26465	4.39373
ALOX5	0.911864	3.12404	8.45165
ALOX5AP	0	0	1.05559
ALOXE3	0.0488049	0.270459	0.0583606
ALPK1	1.73084	2.07773	1.97181
ALPK2	0.00581687	0.0243222	0.11763
ALPK3	0.451308	11.9933	22.3936
ALPL	0.983813	0.072975	1.17476
ALPP	0	0.194964	1.51108
ALPPL2	0	0.0184022	0.333746
ALS2	1.38284	11.3779	5.22491
ALS2CL	1.64147	4.265	12.2998
ALS2CR11	0.0135653	0.0482984	0.100976
ALS2CR12	0.0416387	0.104463	0.912197
ALX1	0.0639776	1.02505	0.571473
ALX3	1.45601	0.497298	0.501669
ALX4	0.200354	0	0.0482336
ALYREF	25.7256	39.2796	28.4178
AMACR	0.48361	2.94273	1.66686
AMBP	0	0.0224775	0
AMBRA1	5.33361	6.53501	14.6629
AMD1	23.5481	18.9452	12.0094
AMD1P1	0.199031	0	0
AMD1P2	0.0931932	0	0.0462466
AMD1P3	0.496711	0.184614	0.744046
AMDHD1	0.481857	0.183816	0.256198
AMDHD2	4.59486	1.8345	2.55337
AMER1	6.38711	2.23324	2.50746
AMER2	0	0.00871737	0.0362105
AMER3	0	0	0.00701155
AMFR	3.125	6.77233	10.2595
AMH	12.0429	0.0424112	0.283736
AMHR2	0	0	0.0262785
AMICA1	0.0063886	0.0160277	0.570598
AMIGO1	2.12069	0.351933	0.312146
AMIGO2	0.0138673	7.99013	6.23952
AMIGO3	1.13091	0.849566	2.45493
AMMECR1	1.45741	3.022	1.22919
AMMECR1-IT1	0.988745	0.488939	0.327106
AMMECR1L	6.46609	8.03123	7.41002
AMMECR1LP1	0.195692	0	0
AMN	0.0994917	0.554966	1.42192
AMN1	0.847173	2.98032	1.94024
AMOT	6.87214	3.85213	3.49659
AMOTL1	0.97855	15.2373	28.0798
AMOTL2	2.0163	48.5258	15.0074
AMPD1	0	0.0439575	0.0551401
AMPD2	8.31934	3.93171	4.69995
AMPD3	1.17907	1.51954	2.17748
AMPH	0.0325597	0.0164031	0.029201
AMT	0.362104	0.952651	1.82823
AMY1B	0.752573	0.376068	0.216214
AMY2A	0	0	0.0487079
AMY2B	0.95027	0.827534	0.820646
AMZ1	0.0327176	10.9049	3.38809
AMZ2	4.27795	18.8244	12.2802
AMZ2P1	0.535108	4.0976	2.71593
AMZ2P2	0	0.174925	0
ANAPC1	3.27664	5.40453	12.632
ANAPC10	1.78513	4.003	1.4445
ANAPC10P1	0.498818	0.296001	0.247535
ANAPC11	1.94807	12.3508	6.59343
ANAPC13	3.92839	18.8893	5.74403
ANAPC15	2.79718	1.73449	3.55938
ANAPC16	15.1585	10.9743	8.4878
ANAPC1P1	0.932961	1.26542	0.836722
ANAPC2	10.0915	4.26171	15.7332
ANAPC4	2.66462	2.17415	2.01406
ANAPC5	7.23562	5.59112	5.46239
ANAPC7	6.48192	4.50444	12.431
ANG	1.35762	0.191814	0.256652
ANGEL1	4.62671	2.59156	3.70503
ANGEL2	10.478	4.35616	3.31516
ANGPT1	0.0128722	0.0907876	0.030785
ANGPT2	0.00677145	0	0.404863
ANGPT4	0	0	0.0197707
ANGPTL2	0.0117965	2.66242	1.50936
ANGPTL4	2.49761	2.73559	3.68748
ANGPTL6	0.0503062	0.0210347	0.0847755
ANGPTL7	0	0.0204989	0.0413082
ANK1	0.04572	1.36793	2.13163
ANK2	0.254422	0.578686	0.406653
ANK3	11.0443	2.06465	2.13317
ANKAR	0.352515	0.764875	1.8785
ANKDD1A	0.326412	0.254769	0.861769
ANKDD1B	0.0562505	0.0834483	0.0976988
ANKEF1	2.35851	1.68043	2.43242
ANKFN1	0.0331335	0.0400611	0.0237725
ANKFY1	1.93871	2.98913	8.47873
ANKH	1.83284	2.53345	7.81955
ANKHD1	7.65022	15.5575	10.4648
ANKHD1-EIF4EBP3	8.85164	7.37813	17.2228
ANKIB1	14.4441	8.40196	4.8579
ANKK1	0	0.282535	2.09947
ANKLE1	0.569865	0.15371	0.449896
ANKLE2	2.14232	7.20392	5.54007
ANKMY1	3.48783	0.908182	2.08657
ANKMY2	1.30203	8.22765	5.26677
ANKRA2	1.01795	2.67712	1.79493
ANKRD1	0	0.840858	0.0277205
ANKRD10	5.04948	59.4194	78.1034
ANKRD10-IT1	7.97361	72.6195	30.7373
ANKRD11	7.84352	9.35732	13.7042
ANKRD12	2.32833	9.55575	10.7071
ANKRD13A	7.05621	4.98582	3.09589
ANKRD13B	3.45372	0.589198	3.00321
ANKRD13C	10.12	8.59596	4.48283
ANKRD13D	3.19057	12.4831	12.4203
ANKRD16	3.70432	1.75285	1.47056
ANKRD17	19.0869	20.1604	14.962
ANKRD18A	0.468089	0.0595215	0.0580716
ANKRD18B	0.0156656	0.678718	0.0561983
ANKRD18CP	1.83034	1.49113	1.15461
ANKRD18DP	0	0.0665071	0.402063
ANKRD19P	0	0.311344	2.00769
ANKRD2	0.151231	0.221321	0.700844
ANKRD20A1	0	0.0354077	0.0237838
ANKRD20A11P	2.11867	0.16107	0.362764
ANKRD20A17P	0.123742	0.689873	0.625586
ANKRD20A18P	1.50321	2.78755	4.10278
ANKRD20A2	0	0	0.0696154
ANKRD20A3	0.0964001	0.235968	0.191352
ANKRD20A4	0.0121638	0.0305166	0.0819935
ANKRD20A5P	0.207524	0.780952	0.384689
ANKRD20A7P	0.249979	0.0190044	0.0765929
ANKRD20A8P	0.0787682	0.0389513	0.0195441
ANKRD20A9P	0.0310435	0	0.0154052
ANKRD22	0.266727	2.02595	1.90601
ANKRD23	2.24033	2.58296	3.22543
ANKRD24	0.206633	0.0980938	0.246097
ANKRD26	5.32031	3.17783	2.09712
ANKRD26P3	0.0598897	0	0
ANKRD26P4	0.193165	0.58388	0.173239
ANKRD27	5.24495	2.63987	5.96702
ANKRD28	9.01609	10.0292	5.55611
ANKRD29	0.0502482	0.0433959	0.103005
ANKRD30A	0	0	0.0182957
ANKRD30B	1.18871	0.200906	0.0183413
ANKRD30BL	0.129831	0.0373752	0.0887147
ANKRD30BP1	0.0845816	0	0
ANKRD30BP3	0	0.0863997	0
ANKRD31	0.124327	1.07583	0.437262
ANKRD32	0.641357	1.05353	1.51828
ANKRD33	0	0.0148067	0.0495294
ANKRD33B	0.510291	0.930858	0.994157
ANKRD34A	0.0873364	0.301706	0.119356
ANKRD34B	0.0114007	4.3421	0.722546
ANKRD35	0.750286	0.687241	0.261
ANKRD36	15.9369	4.42502	3.93296
ANKRD36B	4.99351	4.30084	2.97345
ANKRD36BP2	0.231933	0.0855693	0.425337
ANKRD36C	7.46137	3.29512	2.29543
ANKRD37	3.58324	0.659158	0.355632
ANKRD39	2.36727	1.32551	5.11671
ANKRD40	3.73344	5.94153	10.2762
ANKRD42	0.26609	2.03484	1.11774
ANKRD44	0.356635	0.0564344	0.365754
ANKRD44-IT1	0.205272	0.0429154	0.951286
ANKRD45	0.0787987	0.127032	0.0753816
ANKRD46	4.34536	2.49089	6.19495
ANKRD49	0.728613	3.93283	3.06501
ANKRD50	7.92649	5.6144	3.23442
ANKRD52	8.44817	13.0617	10.0856
ANKRD53	0.146394	0.195459	0.236103
ANKRD54	2.44362	2.88448	1.58941
ANKRD55	0	0.0620662	0
ANKRD6	1.06701	0.572838	2.1422
ANKRD60	0	0.0890633	0
ANKRD61	0.514824	0.174571	0
ANKRD62	0.0228009	0.457622	0.730052
ANKRD62P1	0.642218	0	0.056961
ANKRD62P1-PARP4P3	0.543838	0	0
ANKRD63	0	0.0808816	0.0479956
ANKRD65	0.384616	6.90924	5.44828
ANKRD7	0.140639	0.396771	0.302716
ANKRD9	4.02336	2.22021	2.36536
ANKS1A	6.81684	8.00749	6.37876
ANKS1B	0.823902	0.0373554	0.0836403
ANKS3	3.57195	1.0877	1.90083
ANKS4B	0	0	0.0424851
ANKS6	2.0002	3.36623	8.48452
ANKUB1	0.834136	2.19805	0.968186
ANKZF1	7.20666	4.00751	5.10573
ANLN	8.79072	51.1138	18.0491
ANO1	17.111	1.79057	11.2853
ANO1-AS1	0.142033	0	0
ANO1-AS2	1.01287	0.0546404	0
ANO10	2.02336	2.34286	3.28734
ANO2	0.0733439	0.354715	0.21926
ANO3	0.0498718	0.02979	0.0720371
ANO4	0.0183616	0	0.0768486
ANO5	0.964073	0.348354	0.254418
ANO6	3.57066	12.1168	15.8514
ANO7	0.357129	0.105961	0.193334
ANO7P1	0.165404	0.32275	0.650386
ANO8	6.42353	1.64009	6.07158
ANO9	1.51518	1.63835	2.20956
ANOS1	1.56916	1.38299	1.27031
ANOS2P	0	0.0390239	0
ANP32A	21.9968	6.3847	6.06296
ANP32AP1	0.213578	0.172156	0.102158
ANP32B	52.7535	27.2532	65.363
ANP32BP1	0.12689	0.0707426	0.142556
ANP32C	0	0	0.0778141
ANP32D	0.143364	0.0962997	0
ANP32E	53.7248	16.6479	9.83706
ANPEP	0.583935	0.094896	1.95965
ANTXR1	1.14077	4.55091	4.19251
ANTXR2	0.239146	1.53945	1.96817
ANTXRL	0.123835	0.0295882	0.149061
ANTXRLP1	0.0250829	0	0.029994
ANXA1	20.9216	67.3747	26.377
ANXA11	5.42673	13.5202	9.33756
ANXA2	14.8485	37.6538	18.5578
ANXA2P2	1.7541	7.06953	3.65726
ANXA2P3	0	0	0.0544236
ANXA2R	0.321888	0.346093	0.813663
ANXA3	0.257001	39.5096	29.5587
ANXA4	1.64669	5.51191	3.05017
ANXA5	25.5088	58.5339	17.7921
ANXA6	2.90797	6.7117	3.74015
ANXA7	21.0082	29.5745	39.8604
ANXA8	0.719643	4.48118	18.0977
ANXA8L1	3.11636	2.9038	3.50193
ANXA9	0.556914	2.16311	0.979839
AOAH	0.0263384	0.0156293	0.418248
AOAH-IT1	0	0	0.0957399
AOC1	0.0967026	0	0.431892
AOC2	0.189929	0.591498	0.681349
AOC3	0.0242524	0.162251	0.286089
AOX1	0.0247714	0.465899	0.266593
AOX2P	0	0.023335	0.0235116
AP1AR	6.03429	10.2809	3.58399
AP1B1	10.4982	14.5391	9.67235
AP1G1	10.27	13.6735	7.00975
AP1G2	6.27573	3.80476	11.6615
AP1M1	1.78192	1.04213	0.731037
AP1M2	11.4588	23.1328	12.5873
AP1S1	20.6281	21.1446	9.37486
AP1S2	1.11649	3.01975	2.42391
AP1S3	0.358555	1.74554	1.96376
AP2A1	3.19896	3.61935	9.0693
AP2A2	3.39809	2.23243	6.61848
AP2B1	8.46543	21.1897	9.59507
AP2M1	17.0944	30.414	48.7702
AP2S1	21.4843	15.0669	11.0653
AP3B1	3.71531	8.87801	4.62286
AP3B2	0.730133	0.248373	1.4181
AP3D1	22.7438	12.0612	13.9587
AP3M1	5.23794	21.2511	8.55547
AP3M2	10.4438	6.10127	3.88884
AP3S1	2.84039	13.7313	3.9283
AP3S2	5.23824	3.2134	6.79571
AP4B1	2.82009	1.10227	3.27157
AP4B1-AS1	0	0	0.0264571
AP4E1	1.30457	1.27175	2.86426
AP4M1	4.71832	0.952654	1.36989
AP4S1	0.820264	1.19407	1.94546
AP5B1	5.89526	4.2911	12.8746
AP5M1	1.7282	2.51085	1.19112
AP5S1	4.73184	0.609544	1.13647
AP5Z1	6.17394	3.00914	6.77502
APAF1	1.32269	3.08627	1.30418
APBA1	3.85516	0.0402992	0.251746
APBA2	2.51122	0.0269174	0.694821
APBA3	1.52057	1.02388	3.46096
APBB1	1.46323	0.805518	0.717368
APBB1IP	0.265049	13.1902	5.22269
APBB2	0.713551	3.14181	1.859
APBB3	1.29579	0.939779	3.34311
APC	2.22745	4.16906	2.12556
APC2	0.0391539	0.00363811	0.278589
APCDD1	0.295559	5.60313	3.14953
APCDD1L	0.111332	0.0581895	0.281424
APCDD1L-AS1	0.467853	0.0999454	0.037147
APEH	4.16613	22.7902	12.0081
APEX1	47.238	17.6112	39.1653
APEX2	2.24846	5.64091	8.46131
APH1A	22.0863	26.6722	17.8177
APH1B	0.325662	2.60819	1.2881
API5	39.3365	28.0369	16.7192
API5P1	0.428565	0.363304	0.182291
API5P2	0.0918757	0.123428	0
APIP	1.41833	3.89746	1.51101
APITD1	1.89943	3.45549	1.95587
APITD1-CORT	2.77222	1.40664	1.0567
APLF	1.40812	2.25451	1.32246
APLN	0.171769	0.144224	0.496384
APLNR	0	0.0247319	0.968617
APLP1	0.388997	3.13553	0.870301
APLP2	11.2535	23.288	16.4887
APMAP	28.4802	31.6769	24.2843
APOA1	0	0.0649211	0
APOA1-AS	0.0974404	0	0
APOA1BP	29.413	13.1684	11.3445
APOA4	0	0	0.0627615
APOB	0.0928175	0	0.00369969
APOBEC2	0	0.279006	0.0803194
APOBEC3A	0.509678	0.674686	0.486393
APOBEC3B	1.52438	4.92469	3.32741
APOBEC3C	0	5.27467	14.8284
APOBEC3D	0	1.27178	1.94683
APOBEC3F	0.0424521	2.3668	1.89519
APOBEC3G	0	0.81592	2.98328
APOBEC3H	0	0.18336	0.73899
APOBR	0.195037	0.130203	0.895271
APOC1	0.0372677	0.525698	6.64012
APOC1P1	0	0	0.0985583
APOC2	0	0	1.68353
APOC3	0	0.0633475	0
APOC4	0.0619117	0	0
APOC4-APOC2	0.0505455	0	0.551823
APOD	0.042079	0.14982	5.99298
APOE	0.100153	21.3993	136.878
APOL1	0	0.7327	1.96856
APOL2	0.141714	1.77765	4.61708
APOL3	0.0156664	0.139448	0.691919
APOL4	0.0104813	0.295697	0.902409
APOL6	0.569132	3.22736	6.38484
APOLD1	6.17557	9.50898	4.27935
APOM	0.556914	0.429618	0.663276
APOO	18.6231	6.10839	4.09438
APOOL	4.50735	2.62732	3.55785
APOOP4	0	0	0.0768452
APOOP5	0	0	0.0702013
APOPT1	3.44191	10.3216	3.85073
APP	154.655	80.9334	81.9837
APPBP2	1.71087	4.8543	6.54323
APPL1	5.52256	6.21646	7.45312
APPL2	1.61665	3.21423	6.53124
APRT	5.82681	31.9952	29.392
APTR	1.25645	0.621554	1.34198
APTX	11.9555	7.0655	7.71269
AQP1	0.737261	0.252223	1.46832
AQP11	0.192921	0.435025	0.344649
AQP2	0.0644235	0	0
AQP3	1.01036	2.66051	3.63503
AQP4	0.0308416	0	0.74229
AQP5	1.48425	0	0
AQP6	0.0901225	0	0.00894455
AQP7	0	0.0087334	0
AQP7P1	0.31498	0.351208	0.707733
AQP7P3	0.26642	0.31619	0.0881394
AQP7P4	0	0.0887214	0.105295
AQP8	0	0.0650582	0
AQP9	0	0	2.25761
AQR	2.96031	3.43532	9.54682
AR	0.553957	0.0323201	0.0796027
ARAF	8.08518	25.5506	22.9833
ARAP1	3.56131	9.19781	13.5694
ARAP2	0.332225	6.20384	3.09873
ARAP3	1.1174	2.18778	11.2982
ARC	0.494538	0.110048	0.199397
ARCN1	22.7744	28.0665	13.7509
AREG	2.18778	20.3724	35.9385
AREL1	4.52654	5.12879	9.05754
ARF1	76.1605	51.1899	78.7538
ARF1P2	0.0852724	4.8114	2.34527
ARF3	11.5048	19.7466	34.0071
ARF4	8.89245	44.781	15.6226
ARF4-AS1	1.47026	1.69059	3.09707
ARF4P1	0.683532	0.70982	0
ARF4P2	1.23029	0	0
ARF4P4	0	0.0882242	0
ARF5	30.3877	15.5986	12.7503
ARF6	60.372	42.922	23.5852
ARFGAP1	11.2117	6.69457	7.98487
ARFGAP2	7.75979	9.49783	6.7948
ARFGAP3	9.43344	7.36645	4.46418
ARFGEF1	9.79124	17.9431	8.02069
ARFGEF2	21.9001	22.4097	12.75
ARFGEF3	4.97444	1.53878	2.13145
ARFIP1	6.13806	4.61974	6.68037
ARFIP2	13.2789	4.29618	3.6532
ARFRP1	5.36965	2.58219	4.18646
ARG2	0.340316	0.777891	1.52932
ARGLU1	5.57411	42.1846	37.8519
ARHGAP1	4.82833	15.2724	13.6209
ARHGAP10	1.34904	1.93248	1.65444
ARHGAP11A	4.17514	14.9573	6.83603
ARHGAP11B	1.42865	20.4444	10.6504
ARHGAP12	4.68191	8.96764	3.29819
ARHGAP15	0	0.0212549	0.112573
ARHGAP17	4.94225	1.3978	3.4531
ARHGAP18	2.55028	5.71053	4.88427
ARHGAP19	2.77328	2.49965	2.45488
ARHGAP19-SLIT1	0.92572	1.17805	3.12002
ARHGAP20	0.0384975	0	0.233552
ARHGAP21	16.4363	7.38576	2.98309
ARHGAP22	0.689873	0.39525	0.598491
ARHGAP22-IT1	0.583606	0.0976097	0.196697
ARHGAP23	0.998294	3.88087	15.2545
ARHGAP23P1	0.266676	1.18685	1.72037
ARHGAP24	0.163666	0.263612	0.556924
ARHGAP25	0.135653	0.181119	0.378658
ARHGAP26	0.346324	1.32349	1.42645
ARHGAP26-IT1	0.354716	0.953069	0.565556
ARHGAP27	1.72585	2.59172	6.93402
ARHGAP28	1.8056	0.350526	0.877127
ARHGAP29	9.97596	5.46122	4.59737
ARHGAP30	4.58403	1.46047	2.42662
ARHGAP31	0.344807	4.36697	2.2293
ARHGAP31-AS1	0.35166	2.57321	3.25937
ARHGAP32	4.44924	4.67803	3.8299
ARHGAP33	2.0546	0.436089	1.77514
ARHGAP35	14.0384	11.9701	7.40559
ARHGAP39	12.2951	3.29089	3.66998
ARHGAP4	5.9975	3.83423	5.78801
ARHGAP40	0	7.20484	5.95808
ARHGAP42	0.290693	6.57678	1.93555
ARHGAP42P1	0	0.0467853	0.0277626
ARHGAP42P2	0	0.0214377	0
ARHGAP42P4	0.0186977	0	0
ARHGAP42P5	0.0156255	0	0
ARHGAP44	1.00606	0.153683	0.286698
ARHGAP5	21.1845	9.67388	5.8357
ARHGAP5-AS1	1.06868	0.3972	1.3507
ARHGAP6	0.0174546	0.0117245	0.055659
ARHGAP8	17.5447	4.14465	4.45895
ARHGAP9	0	0.0360631	0.4066
ARHGDIA	13.5872	34.4983	77.9579
ARHGDIB	17.8122	9.34325	7.00589
ARHGDIG	1.44628	0.022585	0.0944351
ARHGEF1	6.50859	3.27146	5.26444
ARHGEF10	2.47557	1.95545	3.63212
ARHGEF10L	7.00387	2.07169	6.65831
ARHGEF11	8.77743	5.91526	15.6903
ARHGEF12	2.33481	7.26959	4.14297
ARHGEF15	0	0.00866577	0.331792
ARHGEF16	1.63699	5.60778	23.7974
ARHGEF17	1.96222	6.20259	4.86536
ARHGEF18	3.14919	10.898	9.66081
ARHGEF19	2.36427	3.80159	9.22861
ARHGEF2	24.1467	6.19753	4.46462
ARHGEF25	2.08285	1.17867	3.45722
ARHGEF26	3.00885	0.387374	0.439751
ARHGEF26-AS1	1.33473	0.0583606	0.0697212
ARHGEF28	0.100635	1.51049	1.0311
ARHGEF3	1.85064	1.63895	1.86456
ARHGEF33	0.0841964	0.369723	0.167128
ARHGEF34P	3.14143	4.06721	5.98258
ARHGEF35	1.90143	5.48364	5.66145
ARHGEF37	4.01859	0.990948	3.24713
ARHGEF38	0.159242	0.0302656	0.158572
ARHGEF38-IT1	0.202736	0.240609	0.100607
ARHGEF39	1.38499	0.798038	1.33776
ARHGEF4	1.43139	5.45768	20.3694
ARHGEF40	1.70868	3.07068	1.88915
ARHGEF5	1.84812	5.33834	16.6209
ARHGEF6	3.77195	0.129318	0.417794
ARHGEF7	5.36555	12.9269	12.7205
ARHGEF7-AS1	0	0.142918	0
ARHGEF7-IT1	0	0.114985	0.0682325
ARHGEF9	4.6931	3.28088	4.00428
ARHGEF9-IT1	1.87711	1.67083	0.349314
ARID1A	14.948	7.70731	10.1171
ARID1B	7.25534	4.97955	9.66182
ARID2	3.7414	14.1336	6.84436
ARID3A	1.73479	5.63754	11.2963
ARID3B	1.2187	0.930529	2.14302
ARID3C	0.195081	0.0655193	0.194397
ARID4A	1.24269	3.68911	1.78321
ARID4B	7.9879	23.1599	10.2703
ARID5A	4.25951	3.08591	3.50851
ARID5B	11.9974	7.15665	10.4692
ARIH1	6.35146	1.41961	3.97186
ARIH2	8.07202	5.67955	5.16734
ARIH2OS	0.137319	0.114835	0.347113
ARL1	3.05905	12.7187	4.39621
ARL10	2.66636	8.35006	2.87723
ARL11	0	2.77875	2.82468
ARL13A	0.478192	0.120453	0.0714775
ARL13B	1.52407	7.41095	2.32431
ARL14	0	7.43011	1.35664
ARL14EP	2.37568	5.66697	2.46941
ARL14EPL	0	0.0336558	0
ARL15	0.241646	2.36171	1.19918
ARL16	2.26115	10.3946	7.1399
ARL17A	1.87538	1.59512	6.34776
ARL17B	0.613542	0.286062	0.717671
ARL2	9.53755	10.9771	7.59473
ARL2-SNX15	4.2386	19.247	12.2928
ARL2BP	3.59775	16.0443	7.48424
ARL3	0.644468	4.16063	1.15598
ARL4A	5.23052	1.89516	1.64839
ARL4C	3.62394	10.9426	8.68065
ARL4D	0.544506	3.67126	11.4126
ARL5A	4.12959	7.11467	5.37595
ARL5AP2	0.102925	0	0
ARL5AP3	0	0.239502	0
ARL5B	7.37423	4.71897	2.25048
ARL5C	0.0270473	0	0
ARL6	0.7556	1.11331	0.727616
ARL6IP1	55.1004	32.4126	18.3206
ARL6IP1P2	0.0974404	0	0
ARL6IP4	8.84253	7.29874	7.70383
ARL6IP5	21.0343	13.7157	16.972
ARL6IP6	1.88378	3.95889	7.8949
ARL8A	47.277	3.44431	5.24967
ARL8B	12.825	31.2772	45.0863
ARL9	3.96834	0.0436081	0.0729357
ARMC1	10.393	19.0516	7.13599
ARMC10	7.53412	7.24209	12.0707
ARMC10P1	1.18939	0.384975	0.107314
ARMC12	0	0.0773751	0.452942
ARMC2	0.348516	0.485752	1.00061
ARMC2-AS1	0	0.825426	0
ARMC3	0.0327737	0.132087	0.0235143
ARMC4	0.0192234	0	0.0229872
ARMC4P1	1.19217	0	0.0537826
ARMC5	0.430222	0.66689	1.21689
ARMC6	10.8829	2.89729	3.13618
ARMC7	0.568785	3.2748	3.59508
ARMC8	4.92438	3.96901	7.75404
ARMC9	0.181709	1.95644	2.95687
ARMCX1	3.2285	0	0.345437
ARMCX2	0	4.20346	4.01372
ARMCX3	4.01186	4.49134	7.67671
ARMCX3-AS1	0	0	0.0936257
ARMCX4	0.962492	0.115051	0.17181
ARMCX5	2.89319	1.47597	3.36961
ARMCX6	1.29022	3.86282	2.75507
ARMCX7P	0	0	0.0394807
ARMS2	0	0.0560838	0
ARMT1	1.80982	8.26722	6.5261
ARNT	7.81294	4.77353	7.59047
ARNT2	1.00633	0.331881	0.812097
ARNTL	0.859419	1.95176	1.70466
ARNTL2	0.702963	7.00341	1.33553
ARPC1A	33.5878	28.4486	16.8112
ARPC1B	0.933904	25.7664	10.7677
ARPC2	10.5522	26.351	19.3728
ARPC3	5.38615	15.8028	23.6849
ARPC3P1	0.102925	0.34429	0
ARPC3P2	0.430362	0.520343	0.102925
ARPC3P5	0	0	0.171822
ARPC4	26.8272	18.0937	13.7197
ARPC4-TTLL3	7.59909	20.0944	12.4598
ARPC5	6.63017	9.72459	9.73729
ARPC5L	7.25638	23.5857	11.5341
ARPIN	4.97267	1.87371	4.37819
ARPP19	11.0638	6.71203	11.5476
ARPP21	0.0409125	0.00916049	0.0163077
ARRB1	1.63786	0.795047	2.52217
ARRB2	3.31983	4.5674	3.95596
ARRDC1	13.8404	6.32739	25.3802
ARRDC1-AS1	8.0945	2.71192	3.0751
ARRDC2	2.75655	0.613403	3.92758
ARRDC3	10.218	9.0749	10.2303
ARRDC3-AS1	0.489659	0.426164	0.485981
ARRDC4	3.98778	2.411	4.99472
ARRDC5	0.112879	0	0.140038
ARSA	6.68448	1.92717	4.11512
ARSB	0.686786	1.53794	2.0704
ARSD	7.18707	1.16812	5.29963
ARSD-AS1	0	0	0.224885
ARSE	0.0956426	0.0642444	0.171553
ARSF	0	0	0.0208151
ARSG	0.0557177	2.84908	2.59845
ARSH	0.438872	0	0.197222
ARSI	0	1.92263	2.14929
ARSJ	0.0545969	0.118709	0.294419
ARSK	0.546809	0.882651	0.814328
ART1	0	0	0.0630182
ART3	5.27623	0.0282025	0
ART4	0.0354613	0	0.00879873
ART5	0	0.328022	0.551509
ARTN	1.00865	3.15779	3.27936
ARV1	10.1427	7.04028	4.13282
ARVCF	9.57206	2.41063	2.43217
ARX	0.031903	0	0
AS3MT	2.07661	2.44173	1.31676
ASAH1	4.44215	9.31882	13.1231
ASAH2	0.423525	0.180638	0.177333
ASAH2B	1.26582	1.37497	0.755915
ASAP1	12.2892	36.0077	20.7907
ASAP1-IT2	3.77802	1.9988	2.41693
ASAP2	21.7727	15.8794	11.2223
ASAP3	5.59727	3.36544	4.5803
ASB1	1.51684	3.21883	3.03538
ASB10	0	0	0.0230985
ASB11	0	0.0294419	0
ASB12	0.286882	0.0425593	0.106772
ASB13	7.69957	2.92458	2.24697
ASB14	0.0141945	0	0.0339474
ASB16	0	0	0.165825
ASB16-AS1	4.62238	0.780513	2.44302
ASB18	0	0	0.0084394
ASB2	0.201771	0.130617	0.773712
ASB4	0.0238258	0	0
ASB6	4.54597	4.96041	2.88419
ASB7	2.46511	5.5842	2.45986
ASB8	1.97315	1.62763	2.35247
ASB9	0.156492	1.23044	1.12604
ASCC1	1.95464	14.3157	6.08889
ASCC2	5.12469	9.16625	7.19163
ASCC3	7.30923	7.69628	13.5389
ASCL2	0.1734	0.149753	0.740537
ASCL3	0.14495	0	0
ASCL5	0	0	0.0456306
ASF1A	11.8268	6.53861	3.86406
ASF1B	9.58984	2.02388	2.90711
ASGR1	0.123329	0.0878211	0.159124
ASH1L	18.113	8.27407	17.4174
ASH1L-AS1	2.12497	1.52932	2.08727
ASH1L-IT1	3.30623	1.84326	4.33348
ASH2L	5.95982	9.18029	5.13104
ASIC1	1.27956	0.103811	0.418388
ASIC2	0.0686104	0	0
ASIC3	0.499081	0.100167	0.975612
ASIC4	0.104493	0.0087384	0.0352182
ASIP	0	0.0589673	0.356482
ASL	4.30973	2.32614	5.03471
ASLP1	12.6263	0.861208	1.65645
ASMT	0.05008	0	0.0497038
ASMTL	6.27568	1.40824	3.25821
ASMTL-AS1	5.95846	0.721654	7.20192
ASNA1	9.94178	26.4696	12.9842
ASNS	4.43305	2.2964	6.59896
ASNSD1	3.68258	16.7986	5.80576
ASNSP1	1.48366	0.880415	0.4316
ASNSP3	0.0351275	0	0.210027
ASPA	0	0.00783679	0.0157922
ASPDH	0	0	0.0559272
ASPG	1.01865	0.150935	0.340349
ASPH	4.08288	7.06903	6.32243
ASPHD1	0.355919	3.07564	7.63733
ASPHD2	0.0550776	0.179758	0.204989
ASPM	10.6576	14.4275	4.85997
ASPN	0.0374282	0.510832	0.520058
ASPRV1	0.67945	0.100797	0.0842932
ASPSCR1	0.819157	2.43022	2.9613
ASRGL1	2.94272	0.0900325	0.241904
ASS1	44.1021	6.74495	7.35529
ASS1P1	0	0	0.0747354
ASS1P10	2.30376	0.0881977	0
ASS1P11	1.21809	0.264092	0
ASS1P2	0.562673	1.51182	0.807409
ASS1P5	1.59217	0.671533	0
ASS1P7	0	0	0.0374197
ASTE1	0.843369	2.7246	1.40869
ASTL	0.0832102	0.111787	0.13267
ASTN1	0.0448744	0	0.0834719
ASTN2	0.529399	0.509125	1.79543
ASUN	6.70662	10.3365	4.78888
ASXL1	9.40621	11.4425	23.5666
ASXL2	4.44569	14.0627	7.64984
ASXL3	0.00731334	0.0073687	0.0131179
ATAD1	3.82183	5.9032	10.7098
ATAD2	22.4742	15.3127	9.20224
ATAD2B	4.99343	10.9788	6.12797
ATAD3A	3.36339	29.6411	18.8226
ATAD3B	7.00398	12.1115	15.981
ATAD3C	0.676079	3.03459	10.6492
ATAD5	2.76039	2.56131	4.44271
ATAT1	7.2171	1.52273	3.94527
ATCAY	0	0	0.0684417
ATE1	2.99	3.0019	2.18154
ATE1-AS1	0.144721	0.194422	0.115371
ATF1	1.29774	3.7655	7.38919
ATF1P1	0.0989786	0	0.059179
ATF2	2.24158	9.41999	4.84583
ATF3	4.49463	3.62243	6.75051
ATF4	59.5725	28.586	27.1902
ATF4P1	0	0.0511267	0
ATF4P2	0.0511267	0	0
ATF4P3	0.675347	0.217219	0.612816
ATF4P4	0	0.025683	0
ATF5	11.7985	3.75136	3.6341
ATF6	9.92884	5.67497	9.35022
ATF6B	23.0109	14.1794	22.6625
ATF7	5.59552	2.68795	3.51261
ATF7IP	12.1083	4.9697	2.77851
ATF7IP2	2.39038	0.0578612	0.0944216
ATG10	1.17065	0.70474	0.564091
ATG10-IT1	0.563234	0.282607	2.27797
ATG101	2.48657	3.90073	7.42702
ATG12	2.36112	3.48115	2.36919
ATG13	8.8605	8.55677	6.57907
ATG14	8.72873	8.0247	4.90367
ATG16L1	2.16823	3.81609	7.27718
ATG16L2	1.9113	0.804639	1.4197
ATG2A	2.94858	3.67829	15.2122
ATG2B	3.36205	7.01271	4.47692
ATG3	2.22632	6.31357	7.2766
ATG4A	1.55562	1.63005	2.90577
ATG4B	5.69616	3.91732	5.94364
ATG4C	3.62656	2.61065	1.57839
ATG4D	3.44376	5.47868	6.33358
ATG5	4.73233	6.17413	10.8982
ATG7	4.19693	4.40958	3.32401
ATG9A	3.03363	5.88593	3.35789
ATG9B	1.31634	0.446357	0.624513
ATHL1	0.698774	1.32571	8.89325
ATIC	6.54045	26.454	12.9745
ATL1	0.284098	3.26535	1.15757
ATL2	21.6673	22.7598	59.0196
ATL3	10.5154	18.1003	9.28993
ATM	1.22171	2.52026	7.55588
ATMIN	9.74377	8.03348	5.01844
ATN1	34.3737	15.6086	17.43
ATOH1	0	1.71124	1.82511
ATOH7	0.278979	0	0.0370669
ATOH8	0.0760761	0	0.15856
ATOX1	1.65446	2.43437	4.9056
ATP10A	0.691527	0.245504	2.33071
ATP10B	0.0653918	0	0.00405628
ATP10D	0.117088	1.96408	3.26149
ATP11A	5.77588	18.036	13.6998
ATP11B	5.70304	10.8805	12.0234
ATP11C	7.43599	2.17398	3.91907
ATP12A	0.0617503	0	0
ATP13A1	5.12174	2.13609	8.94014
ATP13A2	8.32434	4.36532	3.72043
ATP13A3	9.00208	35.5718	10.8849
ATP13A4	0.711624	0.0991844	0.83023
ATP13A5	0.0441971	0	0.00880844
ATP1A1	43.5325	74.419	39.9373
ATP1A1-AS1	0.491008	0.746568	1.0155
ATP1A2	0.601027	0.0801274	0.733945
ATP1A3	0.541474	0.117815	0.438882
ATP1A4	0.382501	0.0698395	0.0219016
ATP1B1	26.155	38.116	14.2183
ATP1B1P1	2.72796	1.49888	1.45401
ATP1B2	0.0980269	0	0.653083
ATP1B3	21.3946	23.0773	17.8606
ATP1B3P1	0.225207	0.133639	0
ATP2A1	0.200029	0.98756	0.442507
ATP2A1-AS1	1.50556	0.157381	0.792862
ATP2A2	8.1101	13.6879	26.4328
ATP2A3	1.64965	0.167132	0.74542
ATP2B1	0.792559	13.4099	4.01055
ATP2B2	0.654819	0.00539685	0.0406187
ATP2B2-IT1	0.0971961	0	0
ATP2B3	0.0613536	0.00728152	0.00608927
ATP2B4	1.85941	12.7626	8.52145
ATP2C1	10.4793	14.8173	23.6401
ATP2C2	1.42092	3.29064	3.35713
ATP4A	0.0117965	0.0950863	0.0282124
ATP5A1	26.8071	14.5345	10.0182
ATP5A1P1	0.0415283	0	0
ATP5A1P10	0.0342227	0	0.230687
ATP5A1P2	1.65743	0	0
ATP5A1P3	0.0364027	0	0
ATP5A1P8	0	0	0.0716093
ATP5B	32.5008	153.841	70.9717
ATP5BP1	0	0.0697064	0.0291465
ATP5C1	60.3732	21.6983	10.0392
ATP5C1P1	0.516467	0	0.0512587
ATP5D	7.31986	6.82058	9.43574
ATP5E	5.92476	31.7778	13.4418
ATP5EP2	0.960495	1.99487	0.71496
ATP5F1	22.9548	19.7349	11.5132
ATP5F1P1	0.886893	4.06185	3.95293
ATP5F1P2	0.120728	0.243283	0
ATP5F1P3	0	0.488792	0.422135
ATP5F1P5	0.120728	0	0.144366
ATP5G1	3.92977	5.30293	3.8181
ATP5G1P1	0	0	0.243925
ATP5G1P3	0.225482	0	0
ATP5G1P6	0.266306	0.334053	2.24388
ATP5G1P7	0.231119	0	0
ATP5G2	7.17524	7.78212	17.5815
ATP5G2P1	0	0.217013	0
ATP5G2P4	0.130617	0	0
ATP5G3	3.88382	9.07382	14.3171
ATP5H	6.72399	22.8536	17.9474
ATP5HP1	0	0.226222	0
ATP5I	8.44324	34.127	14.8819
ATP5J	6.22017	20.1819	9.61307
ATP5J2	16.8556	11.4944	18.9365
ATP5J2-PTCD1	10.3424	6.75552	10.3151
ATP5L	5.81935	26.3511	9.53786
ATP5L2	1.09855	0.0574175	0.578521
ATP5LP3	0.180457	0.15091	0.608208
ATP5LP4	0	0.149435	0.602265
ATP5O	9.07738	14.6871	27.5459
ATP5S	2.26601	4.05896	2.15124
ATP5SL	1.90585	5.3599	2.88006
ATP6AP1	8.03122	25.5726	13.1531
ATP6AP1L	0.363948	0.707672	0.404666
ATP6AP2	44.2297	28.9752	11.9461
ATP6V0A1	4.75951	2.3536	2.29906
ATP6V0A2	1.03589	2.59923	1.65828
ATP6V0A4	0.550011	1.69989	3.02508
ATP6V0B	8.44856	18.4111	10.5838
ATP6V0C	44.556	26.8993	32.8112
ATP6V0D1	1.68713	6.15792	4.10841
ATP6V0D2	0.0182256	0.213379	0.184281
ATP6V0E1	45.1131	33.9362	23.4895
ATP6V0E1P2	0.223914	0.374503	0
ATP6V0E1P3	0.892015	0	0
ATP6V0E2	18.4341	5.18158	3.76917
ATP6V0E2-AS1	0.783461	0.850341	1.85401
ATP6V1A	4.82017	39.2677	11.8701
ATP6V1B1	2.8329	1.40068	10.1403
ATP6V1B1-AS1	0.241668	0.243497	0.0481641
ATP6V1B2	3.50238	5.0537	9.53337
ATP6V1C1	5.52246	16.5363	19.0236
ATP6V1C2	5.72931	0.825195	3.32619
ATP6V1D	2.24546	4.83479	6.21972
ATP6V1E1	6.68438	20.8094	7.44661
ATP6V1E1P1	0	0.0673665	0
ATP6V1E2	2.41487	3.21906	2.87434
ATP6V1F	48.1572	30.2454	21.3393
ATP6V1G1	26.2955	86.4262	39.0528
ATP6V1G1P2	0.26719	0	0
ATP6V1G1P4	0.958615	3.58752	1.9651
ATP6V1G2	0.0641033	0.129177	0.102206
ATP6V1G2-DDX39B	58.8138	34.8716	106.907
ATP6V1H	14.9478	5.97089	3.78549
ATP7A	1.58872	0.817592	1.18147
ATP7B	1.16389	0.674594	0.71189
ATP8A1	1.11442	0.161652	0.188438
ATP8A2	0.0790095	0	0.044382
ATP8A2P3	0	0.0382826	0
ATP8B1	3.24143	9.49215	3.93381
ATP8B2	0.0242349	3.41856	2.53574
ATP8B3	0.184526	0.00782135	0.104651
ATP8B4	0.005051	0.00844795	0.434107
ATP8B5P	0.0889556	0.0223171	0.0299814
ATP9A	10.2568	10.7617	17.518
ATP9B	2.9726	0.989435	2.62544
ATPAF1	2.95699	3.51529	7.34435
ATPAF2	0.981185	1.91076	1.21273
ATPIF1	5.37494	6.06189	12.9219
ATR	5.68082	6.85432	12.9468
ATRAID	12.2247	35.349	20.1068
ATRIP	1.36884	1.95188	5.44158
ATRN	10.6921	12.9805	7.66508
ATRNL1	0.228823	0.112925	0.0223367
ATRX	6.96818	3.30475	7.42104
ATXN1	0.35326	0.0998222	0.397911
ATXN10	21.4526	7.98457	5.0754
ATXN1L	6.28373	8.75558	4.78458
ATXN2	5.99818	4.73268	2.95681
ATXN2L	16.7072	9.17814	32.3595
ATXN3	2.0619	0.673044	0.629538
ATXN3L	0	0	0.026719
ATXN7	7.56613	4.29655	9.39394
ATXN7L1	1.73109	1.29282	1.19043
ATXN7L2	2.04305	0.989501	1.60425
ATXN7L3	4.96742	6.18784	14.754
ATXN7L3B	8.19566	6.902	13.7383
AUH	8.31128	2.45383	2.47872
AUNIP	1.84534	2.32431	3.22492
AUP1	11.3385	44.9603	39.7175
AURKA	6.98803	36.657	11.0917
AURKAIP1	5.55492	36.146	60.3209
AURKAPS1	2.68749	6.9412	3.30421
AURKB	7.54927	5.43449	7.45162
AURKC	1.18644	0.140808	0.541664
AUTS2	7.64316	0.656538	3.07989
AVEN	0.96422	8.43687	4.7334
AVIL	0.132434	1.22447	1.6209
AVL9	5.14709	4.28878	9.48229
AVP	0	0.074114	0
AVPI1	0.56478	4.40818	7.48718
AVPR1A	0	0	0.0930213
AVPR1B	0	0	0.0406721
AWAT2	0.0561067	0	0
AXDND1	0.188358	0.151827	0.0810856
AXIN1	4.86528	2.08948	7.38396
AXIN2	0.440887	0.114121	0.725288
AXL	0.0538112	15.1251	4.11234
AZGP1	20.7728	0	0.0342526
AZGP1P1	0.799259	0	0
AZI2	1.29608	2.16774	3.78586
AZIN1	16.306	39.1888	19.6266
AZIN1-AS1	3.44446	1.04293	3.75295
AZIN2	0.368012	0.475622	0.94435
AZU1	0.207398	0	0.02573
B2M	1.74785	0.39932	14.9246
B3GALNT1	2.30819	1.9851	1.90067
B3GALNT1P1	0	0	0.0470529
B3GALNT2	14.0568	8.2452	6.77448
B3GALNT2P1	0	0.0713882	0
B3GALT1	0	0.009006	0.0181483
B3GALT2	0.112948	0	0
B3GALT4	0.863263	0.954676	1.38253
B3GALT5	5.84295	0.0038312	0.0192234
B3GALT5-AS1	0.711123	0	0
B3GALT6	6.25861	7.82288	8.9209
B3GAT1	0.739455	0	0.105192
B3GAT2	0.0279522	0	0.0334251
B3GAT3	4.06697	7.38787	20.2943
B3GAT3P1	0	0.802895	0.884822
B3GLCT	2.04494	2.06652	1.08512
B3GNT2	5.37178	8.95072	4.23762
B3GNT3	3.77665	9.89416	7.93519
B3GNT4	0.985583	0.269031	0.234763
B3GNT5	5.21296	5.25001	6.85331
B3GNT7	1.7003	0.418	2.03708
B3GNT8	0.263463	0.685456	2.21993
B3GNT9	0.221849	2.48248	2.34337
B3GNTL1	0.173094	2.07944	2.15742
B4GALNT1	0.431852	0.286621	0.473617
B4GALNT2	0.696263	0	0.0244879
B4GALNT3	0.56093	2.7207	14.6008
B4GALNT4	5.46469	8.9965	7.40982
B4GALT1	43.234	31.2408	17.0458
B4GALT1-AS1	0.108841	0.877321	0.455531
B4GALT2	14.3547	5.61903	13.2348
B4GALT3	9.01021	8.31791	6.6282
B4GALT4	1.10562	9.61193	10.5322
B4GALT5	13.0235	21.8404	42.4061
B4GALT6	0.328554	5.13985	2.34696
B4GALT7	4.09744	1.80638	4.33436
B4GAT1	2.38287	4.69394	5.97876
B9D1	1.10244	0.778804	0.846672
B9D2	0.842988	0.458547	0.488049
BAALC	0.013725	0	0.902041
BAALC-AS1	0.520652	1.28764	0.424495
BAALC-AS2	0	0	0.106938
BAAT	0.0485621	0.0270738	0.0545575
BABAM1	9.7138	11.8795	9.19576
BACE1	1.28945	0.440262	2.81586
BACE1-AS	2.80419	0.644136	1.16711
BACE2	2.94284	0.357703	2.76795
BACE2-IT1	3.60287	0	1.4361
BACH1	6.25343	11.6159	9.26806
BACH1-AS1	0	0.105174	0
BACH1-IT1	1.87095	4.97322	9.45871
BACH1-IT2	1.86971	4.5841	7.08933
BACH1-IT3	0.683111	2.70241	2.25993
BACH2	0.431294	1.66266	1.06511
BAD	4.37815	8.71433	4.49663
BAG1	4.22051	1.52277	5.82511
BAG2	0.144852	2.77996	0.874312
BAG3	3.83656	8.60728	7.64888
BAG4	1.83163	13.7451	5.61252
BAG5	11.6254	12.3069	16.8549
BAG6	24.6297	35.1807	79.8253
BAGE2	0.438526	0.430516	0.376483
BAHCC1	2.38101	0.582263	1.22583
BAHD1	1.44799	5.30204	6.46145
BAIAP2	1.55627	7.92563	8.97963
BAIAP2-AS1	2.90533	4.72387	3.5371
BAIAP2L1	11.7727	9.75296	7.65885
BAIAP2L2	2.19703	0.30676	0.47031
BAIAP3	0.39109	0.740855	1.7019
BAK1	4.23093	15.1293	9.72184
BAK1P1	1.01751	0.345025	0.288532
BAMBI	16.0499	0.555118	1.35835
BANF1	47.2635	35.4165	41.1634
BANF1P2	0.700361	0	0
BANF1P3	0.420375	0.527317	0.708411
BANF1P4	0.169913	0.684798	0
BANK1	0	0.692154	0.357155
BANP	1.39222	1.72401	3.49668
BAP1	3.27625	11.5948	7.90056
BARD1	4.69324	3.67113	1.96603
BARHL2	0.0467143	0	0
BARX1	2.65325	0.586562	1.03267
BARX1-AS1	0.161537	0.108507	0.160971
BARX2	12.3358	1.59189	4.06669
BASP1	0.618617	29.4463	46.9119
BASP1P1	0.0689873	0	0
BATF	0.0468128	2.07536	1.79131
BATF2	0.0192894	0.516192	1.26774
BATF3	0.121325	0.0507297	0.204455
BAX	5.33779	8.46931	5.53467
BAZ1A	17.4255	5.44456	5.19076
BAZ1B	17.3685	10.7325	20.7886
BAZ2A	10.4912	10.9035	10.5048
BAZ2B	1.80978	3.20708	7.12986
BBC3	0.533784	1.01751	1.39735
BBIP1	0.0747305	0.664713	1.00748
BBOX1	14.52	0.645661	2.92314
BBOX1-AS1	0.0349669	0.352316	0.501759
BBS1	1.77683	4.18234	4.58869
BBS10	0.663583	4.96312	1.29708
BBS12	0.187142	1.05054	0.431583
BBS2	1.06453	2.41493	1.90396
BBS4	0.829295	1.1141	1.24289
BBS5	0.987365	1.22848	2.75963
BBS7	1.44276	1.73854	2.06758
BBS9	1.23089	1.58476	2.93982
BBX	11.7846	8.5912	6.04889
BCAM	1.96327	13.8377	21.402
BCAN	0.0187483	0.0111253	0.0279111
BCAP29	0.352287	2.4114	2.28673
BCAP31	20.363	22.4313	47.2808
BCAP31P2	0.231698	0.274982	0
BCAR1	7.54449	4.72798	6.06822
BCAR3	1.24682	9.06337	8.67124
BCAR4	0.0696142	0	0.103637
BCAS1	0.0451735	0.0335078	0.100877
BCAS2	10.1713	29.2502	10.3468
BCAS2P1	0.0868021	0	0
BCAS2P2	0	0.274325	0
BCAS3	0.676839	0.862036	2.60896
BCAS4	0.187548	3.16977	2.30056
BCAT1	0.180577	10.8879	4.28961
BCAT2	3.71108	1.44089	4.6904
BCCIP	3.01249	5.68103	9.18722
BCDIN3D	1.10573	0.727417	1.54038
BCDIN3D-AS1	0.0767595	0.154681	0.0152981
BCHE	0.059992	0.0533994	0.044656
BCKDHA	9.14247	2.23837	2.99816
BCKDHB	3.17789	8.15247	5.64625
BCKDK	5.93491	1.88339	5.132
BCL10	5.02079	5.97258	10.1991
BCL11A	4.62874	0.187655	1.72273
BCL11B	0.845058	0.379628	4.91956
BCL2	1.20239	0.424949	1.19404
BCL2A1	0	0.0842545	1.78274
BCL2L1	8.54171	24.558	34.5633
BCL2L10	0.350446	0.207957	0.695627
BCL2L11	2.06713	4.38772	7.7287
BCL2L12	9.26145	3.11924	3.99557
BCL2L13	4.82575	2.73631	5.83982
BCL2L14	0.0358972	0	0.0643884
BCL2L15	0.129503	0.0652418	0.0645248
BCL2L2	5.26776	18.8029	9.16717
BCL2L2-PABPN1	33.7021	24.2719	54.3459
BCL3	5.36094	2.19977	5.13671
BCL6	1.60752	1.77696	14.5568
BCL6B	0.0314726	0.211406	0.363803
BCL7A	2.79522	1.9433	2.3314
BCL7B	5.55939	3.60873	3.32871
BCL7C	5.07676	3.09808	6.81061
BCL9	6.55278	7.45917	5.47735
BCL9L	8.44105	5.34569	19.1253
BCL9P1	0	0	0.0179135
BCLAF1	25.5656	14.1558	8.85753
BCLAF1P1	0.0671858	0	0.0166703
BCO1	0.0156575	0	0.0187232
BCO2	0.0608174	0.326815	0.492914
BCOR	4.71975	4.28479	2.99207
BCORL1	4.3819	1.12517	1.69828
BCR	9.79771	18.2435	14.5454
BCRP1	0.802729	0.555735	0.597524
BCRP2	0.201428	0.151602	0.288528
BCRP3	1.57944	0.717892	0.550319
BCRP4	0	0	0.111922
BCRP6	0.146278	0.0868021	0.145179
BCRP7	0.705906	0.674656	1.01964
BCRP8	1.07945	4.35048	1.72106
BCS1L	2.22662	4.45959	4.1887
BCYRN1	0.721281	4.45948	2.55324
BDH1	2.89938	1.67367	1.23995
BDH2	2.10419	3.43781	4.4073
BDH2P1	0	0.436326	1.25608
BDKRB1	0	0.199608	0.871515
BDKRB2	0.0536176	2.0664	2.8852
BDNF	0.0477766	0.191368	0.0118544
BDNF-AS	0.517127	0.421796	0.323912
BDP1	8.58613	5.09064	3.97676
BEAN1	0.0125285	0.148689	0.142995
BEAN1-AS1	0.0442397	0.0891491	0.105803
BECN1	2.58923	8.28772	4.28505
BECN2	0	0.176993	0.142666
BEGAIN	0.26141	0.0155122	1.01184
BEND2	0.0598109	0	0
BEND3	3.90646	1.46907	3.97421
BEND3P1	0.0154675	0	0.0184959
BEND4	0	0.0210947	0.0125177
BEND5	0.389162	0	0
BEND6	0	0.837404	1.15808
BEND7	5.75502	0.514215	0.275774
BEND7P1	0.360124	0.100386	0.404585
BEST1	0.0621149	0.196583	0.380164
BEST2	0	0.0346762	0.139755
BEST3	0	0.0538818	0.00799344
BEST4	0.0224116	0.587113	0.482394
BET1	2.67811	1.36964	0.664498
BET1L	2.79909	6.54877	5.47455
BEX1	1.26988	2.33631	8.66697
BEX2	7.4638	4.52524	10.534
BEX4	14.4996	9.94914	24.0865
BEX5	0.722507	0.561049	1.30453
BFAR	6.36967	5.20164	10.503
BFSP1	0.850263	0.611498	1.2036
BFSP2-AS1	0	0	0.102632
BGLAP	0.461	0.501173	2.25293
BGN	0.469644	0.598471	11.7962
BHLHA15	2.20113	0.137491	0.229958
BHLHA9	0	0	0.307476
BHLHB9	0.731631	1.22303	0.636276
BHLHB9P1	0.055995	0.132911	0
BHLHE22	0.0168176	0.0562558	0
BHLHE40	12.9368	56.3553	54.0297
BHLHE40-AS1	0.78259	0.161528	0.20262
BHLHE41	0.0468327	0.555815	1.34794
BHMT	2.46947	0.155894	0.0391105
BHMT2	0.275846	5.9256	3.42829
BICC1	0.04222	1.37795	1.38279
BICD1	0.524454	3.54699	2.19258
BICD1P1	0	0.0756528	0
BICD2	5.06091	8.27095	5.15556
BID	9.79371	6.13246	4.52987
BIK	1.32398	2.45509	5.62641
BIN1	0.410499	4.10938	1.93182
BIN2	0.0343216	0.0922171	0.629305
BIN3	1.44935	2.55071	6.34302
BIRC2	5.71168	7.15394	5.35497
BIRC3	0.0656731	2.31885	7.91917
BIRC5	5.09045	19.938	31.2359
BIRC6	14.7772	21.4874	43.1228
BIRC7	0	0.140484	0.234963
BIVM	1.97898	6.82982	13.6615
BIVM-ERCC5	6.54142	20.0687	18.7592
BLACAT1	5.61973	1.63074	2.03794
BLACE	0	0	0.0186794
BLCAP	7.65992	10.9174	12.2139
BLID	0	1.8456	0.745095
BLK	0	0	0.0192479
BLM	5.57424	3.52551	3.46648
BLMH	3.84072	1.6585	1.69118
BLNK	0.0753104	2.88346	2.23638
BLOC1S1	3.10276	11.2768	5.49915
BLOC1S2	2.06909	3.42944	5.81136
BLOC1S3	3.29236	1.37664	4.92407
BLOC1S4	1.96773	2.43994	4.28793
BLOC1S5	1.79908	6.49783	4.25302
BLOC1S5-TXNDC5	26.5923	57.0309	30.5695
BLOC1S6	2.79449	1.50183	3.93568
BLVRA	3.24912	0.964023	1.28485
BLVRB	2.56997	5.95156	9.60567
BLZF1	3.93491	5.50039	6.92147
BLZF2P	1.14537	0.825312	0.771376
BMF	1.73117	1.47043	2.34984
BMI1	5.91423	11.4636	4.15599
BMP1	1.64481	5.95026	11.4214
BMP2	0.0761718	0.0509598	0.231055
BMP2K	2.2698	6.95535	3.95153
BMP3	0	0	0.0161227
BMP4	0	1.02709	1.31982
BMP5	1.53231	12.3747	2.63745
BMP6	0.0332546	0.0394669	0.231033
BMP6P1	0	0.0807937	0.0675649
BMP7	4.04395	0.0405013	3.85268
BMP7-AS1	0	0	0.125823
BMP8A	0.0271138	0.163914	0.0648451
BMP8B	2.37276	0.266668	0.561972
BMPER	0.0233746	2.32375	0.195659
BMPR1A	1.15499	4.28873	1.55981
BMPR1APS1	0.0578521	0.137319	0.0574175
BMPR1APS2	0.0453326	0.0913515	0.0542084
BMPR1B	0.121677	0.0363408	0.146463
BMPR2	3.21045	4.54793	5.78332
BMS1	13.0331	19.4232	15.3316
BMS1P1	6.85098	5.77336	5.01917
BMS1P10	0.737302	1.98102	0.636756
BMS1P13	1.36373	1.03676	2.08921
BMS1P15	0	0.0810234	0.0961594
BMS1P16	0.0805995	0.191313	0.039997
BMS1P19	0	0	0.13959
BMS1P2	3.15955	6.34985	13.6975
BMS1P20	9.88449	21.1818	37.6349
BMS1P3	0	0.396771	0.353169
BMS1P4	4.15179	4.35156	10.7747
BMS1P7	4.22393	0.436089	1.14241
BMS1P8	0.304491	0.562458	0.39445
BMS1P9	0.929813	0.933083	1.14907
BMX	0	0	0.0329464
BNC1	0	1.81708	12.2955
BNC2	0.00716034	0.170656	0.271497
BNIP1	1.54175	5.34226	2.9453
BNIP2	3.44891	1.93431	4.68677
BNIP3	2.84339	2.05045	2.46527
BNIP3L	4.30326	21.6148	6.62332
BNIP3P1	0.434163	0.816572	0.138445
BNIP3P5	0.928189	2.53365	1.75031
BNIP3P7	0	0	0.106316
BNIPL	9.74984	3.09198	5.99632
BOC	1.17245	0.528017	0.759422
BOD1	19.1925	15.9136	39.856
BOD1L1	2.78557	8.52197	5.21956
BOD1L2	0.016937	0	0
BOD1P1	0	1.27222	0.880763
BOK	4.50103	4.78277	13.013
BOK-AS1	0.0713477	0.143776	0
BOLA1	4.88136	2.32366	8.16273
BOLA2	4.65892	1.13838	0.679989
BOLA2B	2.35265	4.94409	2.331
BOLA2P1	0	0	0.197744
BOLA2P3	10.8337	0.642878	1.43364
BOLA3	1.63395	2.1223	3.22219
BOLA3-AS1	1.66345	1.73491	1.27574
BOLA3P2	0	0.169842	0.284066
BOLL	0	0.013701	0.0229154
BOP1	23.8126	6.28396	23.7836
BORA	2.64919	3.20805	6.75456
BPESC1	0	0	0.0262486
BPGM	2.54957	1.64426	3.49546
BPHL	4.14764	2.95261	9.42071
BPI	1.39439	0.00815439	0.0492967
BPIFA2	0	0.0465696	0
BPIFC	0.0246225	0.0205909	0
BPNT1	15.7099	4.86382	2.81479
BPTF	10.2441	16.8305	15.3752
BRAF	5.45418	3.92912	8.97758
BRAFP1	0.121773	0.0169725	0.102606
BRAP	3.9457	3.88672	2.85872
BRAT1	4.38795	3.96861	7.33766
BRCA1	2.03805	1.93889	3.07739
BRCA2	4.01396	4.38095	7.65313
BRCC3	7.48233	8.13149	9.5876
BRCC3P1	1.30249	0.486055	0.922969
BRD1	7.87352	7.58545	7.59585
BRD2	15.4251	13.0558	39.4638
BRD2-IT1	4.10271	3.24609	4.20762
BRD3	10.3479	3.70295	10.8367
BRD4	5.03543	4.49168	20.2967
BRD7	5.27992	4.21197	2.93887
BRD7P2	0.479734	0.306788	0.332888
BRD7P4	0	0.0607409	0
BRD8	3.6282	4.6098	13.2256
BRD9	5.12349	15.2212	15.1819
BRD9P2	0	1.16043	5.50885
BRDT	0	0.0317558	0.0426616
BRE	9.04853	7.60133	5.8022
BRF1	2.97287	1.23589	1.49044
BRF2	1.25222	4.73726	5.66074
BRI3	6.19151	4.96349	8.74286
BRI3BP	3.06972	5.32052	7.7596
BRICD5	2.52977	0.816432	1.27741
BRINP1	0.266919	0.0352445	0.142045
BRINP2	0.111022	0	0.0233867
BRINP3	0.0963119	0.60381	0.0127966
BRIP1	1.38933	13.8828	3.70028
BRIX1	2.26133	11.3277	5.87892
BRK1	31.9611	99.8705	39.3311
BRMS1	4.30663	21.8065	14.7731
BRMS1L	2.42509	3.51097	1.78781
BROX	10.5756	23.2047	6.77475
BRPF1	6.41039	4.88334	10.1613
BRPF3	3.93212	6.05629	15.0002
BRSK1	3.78485	2.23351	4.57304
BRSK2	4.49984	0.0476827	0.059813
BRWD1	6.72364	4.89267	7.83241
BRWD1-AS1	0.597524	0.401365	0.238172
BRWD1-AS2	2.06838	0.266824	0.44627
BRWD1-IT1	1.03199	3.59204	1.90716
BRWD1P1	0	0.123657	0
BRWD1P3	0	0	0.237045
BRWD3	2.40333	3.87444	2.22997
BSCL2	6.83488	3.69095	8.02068
BSDC1	8.38825	4.29529	5.0405
BSG	38.301	21.2973	58.2444
BSN	0.158913	0.0791707	0.273497
BSN-AS2	0.0881225	0.319642	0.126452
BSND	0	0.0264266	0.133133
BSPRY	11.5016	2.69721	1.21605
BST1	0.354081	2.63693	1.19659
BST2	0	1.42172	26.0336
BTAF1	7.99864	8.28455	6.00837
BTBD1	7.19676	7.47298	4.22397
BTBD10	7.90897	4.97576	3.24221
BTBD10P1	0.410271	0.121728	0.0678648
BTBD10P2	1.01797	3.41892	1.37959
BTBD11	0.0231583	0.0116668	0.124616
BTBD16	0.159606	0.228811	0.268967
BTBD17	0	0	0.0254164
BTBD19	0.560424	4.35975	4.53521
BTBD2	8.18122	5.49025	6.13748
BTBD3	9.57604	5.2102	2.87155
BTBD6	8.18951	14.4546	7.88941
BTBD6P1	0	0.0362088	0
BTBD7	5.52317	3.3194	4.60892
BTBD7P1	3.70005	0.568327	1.78151
BTBD8	1.99232	1.31411	1.84422
BTBD9	2.15505	1.91933	1.57036
BTC	0.70053	0.525271	0.428586
BTD	1.62918	3.45561	3.69391
BTF3	25.1502	37.7873	56.0982
BTF3L4	7.32105	3.14709	2.01326
BTF3L4P1	3.35814	0.70332	0.294081
BTF3L4P2	1.10986	0.530365	2.13752
BTF3L4P3	2.89138	1.74796	0.806749
BTF3P10	0.09268	0	0.110826
BTF3P14	0	0	0.0963794
BTF3P2	0.0942024	0.379662	0
BTF3P4	0	0.110826	0
BTF3P5	0	0	0.117471
BTF3P6	0.643559	0.741063	2.41863
BTF3P7	0.0940094	0.189442	0.224832
BTF3P8	0	0.175756	0
BTF3P9	1.13476	3.2667	0
BTG1	10.1704	6.55504	7.10737
BTG2	4.02384	1.65154	11.0323
BTG3	10.6239	10.8957	8.81324
BTK	0.0701937	0.0202071	0.251812
BTLA	0	0.0124091	0.0250061
BTN2A1	3.37527	4.22787	8.51973
BTN2A2	0.00717046	1.93623	1.0032
BTN2A3P	0.243458	0.446542	0.637022
BTN3A1	0.118678	0.992462	3.24992
BTN3A2	0.0656402	0.654381	0.89903
BTN3A3	0.0405413	0.767946	1.23137
BTNL2	0	0	0.11211
BTNL3	0	0	0.0188019
BTNL8	0	0	0.0235595
BTNL9	0.313263	0	0.0788628
BTRC	1.85822	2.31013	4.50146
BUB1	3.37412	9.93283	16.0465
BUB1B	4.7045	16.2341	10.7365
BUB3	3.81936	10.2695	5.26778
BUB3P1	0.137768	0	0.0549139
BUD13	3.19761	3.88572	6.90411
BUD13P1	0	0.248348	0.294742
BUD31	10.4057	7.18857	4.20038
BUD31P2	0	0.365726	0.152922
[truncated: 23,013 more rows]
